# Supplementary material for: Subglacial lake activity beneath the ablation zone of the Greenland Ice Sheet
Source: Copernicus journal article supplement (doi:10.5194/tc-2022-122), 2022-07-04
Supplement: Supplementary file 1 [file Table S1 Effects of the buffer size on lake elevation change rate.xlsx]

## Sheet: Sheet1
Lake Name	dh_inside_MED (m/yr)	dh_inside_STD (m/yr)	(a)dh_2km_MED (m/yr)	(a)dh_2km_STD (m/yr)	(b)dh_1/3radius_MED (m/yr)	(b)dh_1/3radius_STD (m/yr)	(c)dh_radius_MED (m/yr)	(c)dh_radius_STD (m/yr)	dh_case(a) (m/yr)	dh_case(b) (m/yr)	dh_case(c) (m/yr)
ACADEMY01	-0.65	0.36	-0.67	0.22	-0.73	0.19	-0.64	0.16	0.02	0.08	-0.01
ACADEMY02	3.03	1.53	-0.69	0.53	0.78	1.66	0.7	1.51	3.72	2.25	2.33
ACADEMY03	1.05	1.64	-0.82	0.24	-0.91	0.27	-0.88	0.25	1.87	1.95	1.93
ACADEMY04	-0.11	2.55	-0.45	0.63	-0.28	1.49	-0.37	1.32	0.34	0.17	0.27
ACADEMY05	-0.04	0.3	-0.38	0.26	-0.46	0.23	-0.41	0.18	0.34	0.42	0.37
HAYES_GLETSCHER_N_NN01	-3.15	5.37	-0.5	1.27	-0.54	1.34	1.03	1.37	-2.65	-4.76	-4.18
HAYES_GLETSCHER_N_NN02	0.5	4.41	-0.68	0.4	-0.72	0.55	-0.75	0.5	1.18	1.22	1.25
HAYES_GLETSCHER_N_NN03	0.8	0.61	-0.11	0.95	1.1	1	0.88	0.93	0.91	-0.3	-0.08
HAYES_GLETSCHER_N_NN04	-10.54	2.95	-1.42	1.14	-2.02	1.27	-1.99	1.24	-9.12	-8.52	-8.55
ICE_CAPS_NE01	-4.65	4.02	-0.18	0.71	0.28	1.31	0.21	1.18	-4.47	-4.93	-4.86
ILLULLIP_SERMIA01	2.16	4.12	-0.42	1.27	0.3	0.88	0.13	0.8	2.58	1.87	2.03
ILLULLIP_SERMIA02	6.24	5.36	-0.17	0.66	0.21	1.01	0.01	0.87	6.4	6.02	6.22
ILLULLIP_SERMIA03	3.96	3.14	-0.28	2.58	-0.15	0.74	-0.25	0.66	4.24	4.11	4.21
INUPPAAT_QUUAT01	2.14388	1.4375	-1.2197	1.02718	-0.70817	0.47309	-0.823331	0.431583	3.36358	2.85205	2.96721
INUPPAAT_QUUAT02	0.47	6.07	0	0.54	0.56	0.4	0.34	0.4	0.46	-0.09	0.13
JAKOBSHAVN_ISBRAE01	0.2	1.43	-0.35	0.3	-0.4	0.29	-0.36	0.28	0.55	0.6	0.57
JAKOBSHAVN_ISBRAE02	-2.34	2.54	-1.82	0.53	-1.84	0.45	-1.91	0.46	-0.51	-0.49	-0.43
JAKOBSHAVN_ISBRAE03	5.47	2.7	-1.53	0.4	-1.69	0.52	-1.69	0.46	7	7.16	7.16
JAKOBSHAVN_ISBRAE04	0.5	1.78	-1.82	0.53	-2.14	0.4	-2.16	0.47	2.32	2.64	2.66
JAKOBSHAVN_ISBRAE05	3.78	4.32	-1.35	0.77	-0.64	0.48	-0.62	0.54	5.13	4.42	4.4
KAKIVFAAT_SERMIAT01	0.75	1.94	-1.07	0.4	-1.14	0.62	-1.06	0.46	1.82	1.89	1.81
KANGIATA_NUNAATA_SERMIA01	-6.67	1.82	-0.65	0.57	-1.14	1.01	-0.82	0.96	-6.02	-5.54	-5.86
KANGILINNGUATA_SERMIA01	-3.29	0.43	0.1	0.57	-1.52	1.12	-0.1	1.11	-3.38	-1.77	-3.19
KJER_GLETSCHER01	-10.08	2.85	-2.24	0.6	-1.84	0.59	-1.95	0.65	-7.85	-8.25	-8.13
KJER_GLETSCHER02	0.09	6.73	-0.86	0.57	0	0.52	-0.35	0.52	0.95	0.08	0.43
KJER_GLETSCHER03	-2.3	1.51	-1.03	0.55	-0.95	0.83	-0.93	0.7	-1.28	-1.35	-1.37
KONG_OSCAR_GLETSCHER01	-1.17	0.45	-0.51	0.41	-0.77	0.53	-0.61	0.48	-0.66	-0.4	-0.57
KONG_OSCAR_GLETSCHER02	-1.44	4.89	-0.55	0.85	-1.21	0.98	-0.46	0.95	-0.88	-0.23	-0.97
NANSEN_GLETSCHER01	-0.12	0.3	-0.66	0.22	-0.63	0.16	-0.61	0.12	0.54	0.51	0.49
NORDENSKIOLD_GLETSCHER01	-0.49	0.27	-1.14	0.88	-0.74	1.62	-0.86	1.38	0.65	0.25	0.38
NORDENSKIOLD_GLETSCHER02	-0.47	2.77	-0.63	0.71	-0.75	1	-0.71	0.86	0.16	0.28	0.24
PETERMANN_GLETSCHER01	2.28	1.21	-0.44	0.28	-0.48	0.68	-0.45	0.55	2.72	2.76	2.73
PETERMANN_GLETSCHER02	-1.2	0.93	-1.13	0.93	-1.59	0.93	-1.29	0.9	-0.07	0.39	0.1
RYDER_GLETSCHER01	-0.05	1.79	-0.3	0.41	-0.42	0.55	-0.4	0.44	0.25	0.37	0.36
RYDER_GLETSCHER02	-4.75	3.21	-0.75	0.93	-0.75	1.05	-0.75	0.93	-3.99	-4	-3.99
SAQQAP-MAJORQAQ-SOUTHTERRUSSEL_SOUTHQUARUSSEL01	0.7	1.5	-0.18	0.28	0.09	0.17	-0.17	0.25	0.88	0.61	0.87
SAQQAP-MAJORQAQ-SOUTHTERRUSSEL_SOUTHQUARUSSEL02	-7.16	0.75	-0.53	0.98	-0.77	1.91	-0.61	1.73	-6.63	-6.39	-6.55
SAQQARLIUP_ALANGORLIUP01	0.11	1.67	-0.03	0.31	-0.13	0.22	-0.19	0.19	0.15	0.24	0.3
SAQQARLIUP_ALANGORLIUP02	3.87	2.3	-0.99	0.3	-1.19	0.3	-1.15	0.27	4.86	5.06	5.02
SERMEQ_AVANNARLEQ2_01	-2.19	1.31	0.03	0.55	0.15	0.79	0.16	0.61	-2.21	-2.34	-2.34
SERMEQ_KUJALLEQ01	5.14	3.07	0.31	0.65	-0.41	0	0.12	0.31	4.84	5.55	5.02
SERMEQ_KUJALLEQ02	4.87	2.14	0.31	0.32	0	0.5	0.53	0.54	4.56	4.87	4.33
STEENSTRUP-DIETRICHSON01	1.08	4.98	-0.81	0.73	-0.51	1.07	-0.65	0.94	1.89	1.59	1.73
STEENSTRUP-DIETRICHSON02	2.71	3.79	-0.83	0.5	-0.25	0.44	-0.41	0.45	3.54	2.95	3.12
STEENSTRUP-DIETRICHSON03	4.92	4.07	-1.79	0.64	-0.53	0.3	-1.26	0.72	6.71	5.45	6.18
STORE_GLETSCHER01	-1.64	0.42	0.08	0.76	-0.7	1.22	-0.22	1.11	-1.73	-0.95	-1.42
STORE_GLETSCHER02	-7.03	4.07	-0.4	1.38	-1.72	3.1	-1.54	2.83	-6.63	-5.31	-5.5
SVERDRUP_GLETSCHER01	-1.99	3.4	-1.29	0.66	-1.55	0.67	-1.55	0.65	-0.7	-0.44	-0.44
USULLUUP_SERMIA01	1.54	8.07	-0.45	0.61	-0.4	0.53	-0.46	0.57	1.99	1.94	2
USULLUUP_SERMIA02	2.46	3.44	-1	1.05	0.06	1.32	-0.09	1.22	3.46	2.4	2.55
VESTFJORD01	-16.35	0.33	-0.43	2.68	-0.25	2.07	-0.31	3.9	-15.92	-16.1	-16.03
