# Supplementary material for: Subglacial lake activity beneath the ablation zone of the Greenland Ice Sheet
Source: Copernicus journal article supplement (doi:10.5194/tc-2022-122), 2022-07-04
Supplement: Supplementary file 2 [file Table S2 Parameters for all 61 lakes detected by ICESat-2 from March 2019 to December 2020.xlsx]

## Sheet: Sheet1
NAME	Lat (oN)	Lon (oE)	Track Number	Area (km2)	dH (m/yr)	dV (106 m3/yr)	Active lake fill-drain pattern	Twinned with supraglacial lakes	Confidence level	Prior Reference
ACADEMY01	81.33	-34.19	3	0.8	-0.01	-0.01			M
ACADEMY02	81.32	-33.84	1	0.56	2.33	1.31			M
ACADEMY03	81.3	-33.15	1	1.13	1.93	2.18			H
ACADEMY04	81.29	-31.85	3	3.03	0.27	0.81			H
ACADEMY05	81.25	-34.42	2	0.2	0.37	0.08			M
EQIP_SERMIA01	69.77	-48.87	2		-2.03				M
HAYES_GLETSCHER_N_NN01	74.92	-55.32	1	5.45	0.93	5.07	4	1	M
HAYES_GLETSCHER_N_NN02	74.92	-55.23	2	9.1	1.03	9.37		1	M
HAYES_GLETSCHER_N_NN03	74.99	-55.87	2	1.52	-1.23	-1.87		1	M
HAYES_GLETSCHER_N_NN04	75.15	-56.31	2	0.65	-8.1	-5.27		1	M
HAYES_GLETSCHER_N_NN05	75.12	-55.92	2		-1.45			1	M
ICE_CAPS_NE01	81.16	-16.59	3	3.42	-4.86	-16.6			H	Willis et al. (2015)
ILLULLIP_SERMIA01	74.45	-54.6	3	3.8	2.03	7.72	4		M
ILLULLIP_SERMIA02	74.53	-54.87	1	1.82	6.22	11.33			M
ILLULLIP_SERMIA03	74.55	-54.82	2	1.93	4.21	8.12	4		M
INUPPAAT_QUUAT01	67.61	-48.71	1	1.26	2.97	3.74			H	Howat et al. (2015); Palmer et al. (2015)
INUPPAAT_QUUAT02	67.73	-47.58	2	7.71	0.13	1	4		H
JAKOBSHAVN_ISBRAE01	68.77	-47.39	2	4.99	0.57	2.83	4		M
JAKOBSHAVN_ISBRAE02	68.82	-48.12	3	7.57	-0.43	-3.25	4		M
JAKOBSHAVN_ISBRAE03	68.88	-48.22	2	2.57	7.16	18.42	4		M
JAKOBSHAVN_ISBRAE04	68.94	-47.99	1	5.29	2.66	14.09	4		H
JAKOBSHAVN_ISBRAE05	68.98	-47.84	2	7.61	4.4	33.5	4		M
KAKIVFAAT_SERMIAT01	73.67	-53.89	2	5.57	1.81	10.08	5		M
KAKIVFAAT_SERMIAT02	73.47	-54.24	2		10.3			1	M
KANGIATA_NUNAATA_SERMIA01	64.03	-48.73	1	0.98	-5.86	-5.74	1		H
KANGILERNGATA_SERMIA01	69.81	-48.95	1		2.82				M
KANGILINNGUATA_SERMIA01	65.02	-48.75	1	0.68	-3.19	-2.16			M
KJER_GLETSCHER01	75.32	-56.56	1	1.61	-8.13	-13.06			M
KJER_GLETSCHER02	75.32	-55.97	3	4.38	0.43	1.9			M
KJER_GLETSCHER03	75.37	-55.98	1	4.45	-1.37	-6.11			M
KONG_OSCAR_GLETSCHER01	76.12	-58.64	1	0.81	-0.57	-0.46			M
KONG_OSCAR_GLETSCHER02	76.2	-58.67	1	3.57	-0.97	-3.47			M
NANSEN_GLETSCHER01	76.08	-58.1	1	2.35	0.49	1.16	4		M
NIOGHALVFJERDSFJORDEN01	79.06	-24.52	2		-4.7			1	M
NIOGHALVFJERDSFJORDEN02	79.08	-24.51	1		-3.73			1	M
NIOGHALVFJERDSFJORDEN03	78.99	-24.31	2		-2.63				M
NORDENSKIOLD_GLETSCHER01	68.45	-49.03	1	1.34	1.14	1.53		1	M
NORDENSKIOLD_GLETSCHER02	68.62	-48.13	2	0.96	0.24	0.23		1	M
PETERMANN_GLETSCHER01	79.9	-58.05	4	2.34	2.01	4.7		1	M
PETERMANN_GLETSCHER02	80.08	-58.64	2	3.62	0.1	0.35			H
RYDER_GLETSCHER01	80.89	-50.01	1	1.83	0.36	0.65			M
RYDER_GLETSCHER02	81	-49.74	2	1.77	-3.99	-7.09			M
SAQQAP-MAJORQAQ-SOUTHTERRUSSEL_SOUTHQUARUSSEL01	65.54	-48.76	1	1.46	0.87	1.27			M
SAQQAP-MAJORQAQ-SOUTHTERRUSSEL_SOUTHQUARUSSEL02	66.45	-48.68	1	2.31	-7.81	-18.04		1	M
SAQQARLIUP_ALANGORLIUP01	68.62	-47.64	2	5.37	1.22	6.55	4	1	H
SAQQARLIUP_ALANGORLIUP02	68.71	-47.84	2	8.4	5.02	42.15			M
SERMEQ_AVANNARLEQ2_01	70.39	-49.24	1	0.87	-2.34	-2.05	5		M
SERMEQ_KUJALLEQ01	70.07	-49.03	1	1.54	5.02	7.75	4		M
SERMEQ_KUJALLEQ02	70.09	-48.94	1	1.95	4.33	8.44			M
STEENSTRUP-DIETRICHSON01	75.47	-56.23	2	2.33	1.73	4.03	4		H
STEENSTRUP-DIETRICHSON02	75.55	-56.33	4	2.51	4.65	11.67	4	1	M
STEENSTRUP-DIETRICHSON03	75.61	-57	1	0.65	6.18	4.04	2		H
STEENSTRUP-DIETRICHSON04	75.65	-56.88	1		-3.04				H
STEENSTRUP-DIETRICHSON05	75.64	-56.91	1		-7.9				H
STORE_GLETSCHER01	70.41	-49.33	1	0.79	2.21	1.75		1	M
STORE_GLETSCHER02	70.44	-49.47	2	4.29	-12.05	-51.7	5	1	M
SVERDRUP_GLETSCHER01	75.73	-56.98	3	2.8	-0.44	-1.23			M
USULLUUP_SERMIA01	67.78	-47.7	2	16.23	2	32.46	4		H
USULLUUP_SERMIA02	68.07	-48.4	2	0.36	-1.31	-0.47		1	M
USULLUUP_SERMIA03	67.91	-47.84	2		4.72			1	M
VESTFJORD01	70.32	-30.31	1	0.27	-16.03	-4.29			H
Previous detected lakes missed by ICESat-2
Sioqqap Sermia01	63.54	-48.45								Bowling et al. (2019)
Sioqqap Sermia02	63.26	-48.21								Bowling et al. (2019)
Isunguata Sermia 02	67.18	-50.15								Livingstone et al. (2019)
Isunguata Sermia 03	67.18	-50.13								Livingstone et al. (2019)
Isunguata Sermia01	67.18	-50.19								Livingstone et al. (2019)
References
Bowling, J.S., Livingstone, S.J., Sole, A.J. and Chu, W., 2019. Distribution and dynamics of Greenland subglacial lakes. Nature communications, 10(1), pp.1-11.
Howat, I.M., Porter, C., Noh, M.J., Smith, B.E. and Jeong, S., 2015. Brief communication: Sudden drainage of a subglacial lake beneath the Greenland Ice Sheet. The Cryosphere, 9(1), pp.103-108.
Livingstone, S.J., Sole, A.J., Storrar, R.D., Harrison, D., Ross, N. and Bowling, J., 2019. Brief communication: Subglacial lake drainage beneath Isunguata Sermia, West Greenland: Geomorphic and ice dynamic effects. The Cryosphere, 13(10), pp.2789-2796.
Palmer, S., McMillan, M. and Morlighem, M., 2015. Subglacial lake drainage detected beneath the Greenland ice sheet. Nature Communications, 6(1), pp.1-7.
Willis, M.J., Herried, B.G., Bevis, M.G. and Bell, R.E., 2015. Recharge of a subglacial lake by surface meltwater in northeast Greenland. Nature, 518(7538), pp.223-227.
