# Supplementary material for: Subglacial lake activity beneath the ablation zone of the Greenland Ice Sheet
Source: Copernicus journal article supplement (doi:10.5194/tc-2022-122), 2022-07-04
Supplement: Supplementary file 3 [file Table S3 Parameters for all 61 lakes detected by ICESat-2 for each activity.xlsx]

## Sheet: Sheet1
NAME	Lat (oN)	Lon (oE)	Track Number	Area (km2)	Start Date	End Date	dH (m/yr)	dV (106 m3/yr)
ACADEMY01	81.33	-34.19	3	0.8	2019-04-09	2019-10-08	-0.73	-0.59
ACADEMY02	81.32	-33.84	1	0.56	2020-04-07	2020-10-05	6.45	3.64
ACADEMY03	81.3	-33.15	1	1.13	2019-04-12	2019-10-10	8.15	9.22
ACADEMY04	81.29	-31.85	3	3.03	2019-09-04	2019-12-03	-3.99	-12.11
ACADEMY05	81.25	-34.42	2	0.2	2019-06-10	2019-09-09	-0.57	-0.12
EQIP_SERMIA01	69.77	-48.87	2		2020-05-09	2020-08-07	-8.96
HAYES_GLETSCHER_N_NN01	74.92	-55.32	1	5.45	2019-05-06	2019-08-05	-34.32	-187.05
					2019-08-05	2019-11-04	5.68	30.93
					2020-05-03	2020-08-02	-32.18	-175.27
					2020-08-02	2020-11-01	9.68	52.74
HAYES_GLETSCHER_N_NN02	74.92	-55.23	2	9.1	2019-05-06	2019-08-05	26.92	232.36
HAYES_GLETSCHER_N_NN03	74.99	-55.87	2	1.52	2019-03-29	2019-09-27	-22.44	-34.08
					2019-09-27	2020-09-24	14.38	21.86
HAYES_GLETSCHER_N_NN04	75.15	-56.31	2	0.65	2019-05-10	2019-08-09	-15.15	-9.85
					2019-08-09	2019-11-08	-6.75	-4.39
					2020-05-07	2020-08-06	18.9	12.32
HAYES_GLETSCHER_N_NN05	75.12	-55.92	2		2019-09-07	2019-12-06	-44.53
					2020-06-05	2020-09-04	15.38
ICE_CAPS_NE01	81.16	-16.59	3	3.42	2019-06-20	2019-09-18	-10.93	-37.34
					2020-07-16	2020-10-15	3.82	13.05
ILLULLIP_SERMIA01	74.45	-54.6	3	3.8	2019-06-20	2020-12-16	5.47	20.8
ILLULLIP_SERMIA02	74.53	-54.87	1	1.82	2019-10-22	2020-10-19	6	10.92
ILLULLIP_SERMIA03	74.55	-54.82	2	1.93	2019-05-22	2019-11-20	4.49	8.66
INUPPAAT_QUUAT01	67.61	-48.66	1	1.26	2019-05-07	2020-02-04	3.39	4.27
					2020-02-04	2020-11-02	2.79	3.52
INUPPAAT_QUUAT02	67.73	-47.58	2	7.71	2019-06-01	2019-08-31	-53.1	-409.64
					2019-10-11	2020-10-08	3.25	25.08
JAKOBSHAVN_ISBRAE01	68.77	-47.39	2	4.99	2019-06-01	2020-02-29	4.31	21.51
JAKOBSHAVN_ISBRAE02	68.82	-48.12	3	7.57	2019-06-13	2019-12-11	-10.15	-76.82
JAKOBSHAVN_ISBRAE03	68.88	-48.22	2	2.57	2020-02-04	2020-08-03	17.68	45.45
JAKOBSHAVN_ISBRAE04	68.94	-47.99	1	5.29	2020-04-09	2020-10-08	6.82	36.09
JAKOBSHAVN_ISBRAE05	68.98	-47.84	2	7.61	2019-04-04	2020-01-02	14.54	110.64
KAKIVFAAT_SERMIAT01	73.67	-53.89	2	5.57	2019-04-15	2019-10-14	11.59	64.53
KAKIVFAAT_SERMIAT02	73.47	-54.24	2		2019-09-03	2020-03-02	6.32
					2020-03-02	2020-08-31	30.54
KANGIATA_NUNAATA_SERMIA01	64.03	-48.73	1	0.98	2019-06-01	2019-08-31	-37.86	-25.66
KANGILERNGATA_SERMIA01	69.81	-48.95	1		2020-04-10	2020-10-08	4.27
KANGILINNGUATA_SERMIA01	65.02	-48.75	1	0.68	2020-05-01	2020-10-29	-6.19	-4.2
KJER_GLETSCHER01	75.32	-56.56	1	1.61	2019-04-11	2020-01-08	-19.43	-31.28
					2020-07-08	2020-10-07	20.41	32.76
KJER_GLETSCHER02	75.32	-55.97	3	4.38	2019-07-31	2020-01-29	-22.4	-98.16
					2020-07-29	2020-10-27	1.89	8.28
KJER_GLETSCHER03	75.37	-55.98	1	4.45	2020-09-07	2019-12-06	-23.62	-105.11
					2020-09-04	2020-12-04	1.58	7.04
KONG_OSCAR_GLETSCHER01	76.12	-58.64	1	0.81	2019-04-19	2019-10-18	5.11	4.12
KONG_OSCAR_GLETSCHER02	76.2	-58.67	1	3.57	2020-01-16	2020-10-15	-2.51	-8.98
NANSEN_GLETSCHER01	76.08	-58.1	1	2.35	2020-06-13	2020-09-12	1.19	2.8
NIOGHALVFJERDSFJORDEN01	79.06	-24.52	2		2019-05-06	2019-08-05	12.37
					2019-08-05	2019-11-04	-27.44
					2020-05-04	2020-08-02	-14.74
					2020-08-02	2020-11-01	13.99
NIOGHALVFJERDSFJORDEN02	79.08	-24.51	1		2019-05-06	2019-08-05	-3.12
					2019-08-05	2019-11-04	5.29
					2020-05-04	2020-08-02	-14.38
					2020-08-02	2020-11-01	14.12
NIOGHALVFJERDSFJORDEN03	78.99	-24.31	2		2020-03-03	2020-08-31	-6.25
NORDENSKIOLD_GLETSCHER01	68.45	-49.03	1	1.34	2019-05-19	2019-08-18	-53.65	-71.89
					2020-05-16	2020-08-15	12.73	17.06
NORDENSKIOLD_GLETSCHER02	68.62	-48.13	2	0.96	2019-06-05	2019-12-04	-6.92	-6.66
					2020-03-11	2020-09-09	7.01	6.75
PETERMANN_GLETSCHER01	79.9	-58.05	4	2.34	2019-04-28	2019-10-27	6.91	16.19
PETERMANN_GLETSCHER02	80.08	-58.64	2	3.62	2019-05-31	2019-11-28	-14.15	-51.3
RYDER_GLETSCHER01	80.89	-50.01	1	1.83	2020-04-25	2020-07-25	0.19	0.36
RYDER_GLETSCHER02	81	-49.74	2	1.77	2019-05-08	2019-11-05	-37.71	-66.9
					2019-11-05	2020-11-03	5.74	10.18
SAQQAP-MAJORQAQ-SOUTHTERRUSSEL_SOUTHQUARUSSEL01	65.54	-48.76	1	1.46	2019-06-21	2019-09-20	-13.69	-20.04
					2020-06-18	2020-09-17	11.83	17.32
SAQQAP-MAJORQAQ-SOUTHTERRUSSEL_SOUTHQUARUSSEL02	66.45	-48.68	1	2.31	2019-04-20	2020-01-17	-17.38	-40.08
					2020-04-17	2020-07-17	22.4	51.74
SAQQARLIUP_ALANGORLIUP01	68.62	-47.64	2	5.37	2019-08-02	2019-11-01	10.11	54.57
SAQQARLIUP_ALANGORLIUP02	68.71	-47.84	2	8.4	2019-04-04	2020-01-02	8.69	72.98
SERMEQ_AVANNARLEQ2_01	70.39	-49.24	1	0.87	2019-08-14	2019-11-13	-14.48	-12.66
					2020-05-13	2020-08-11	-4.31	-3.76
SERMEQ_KUJALLEQ01	70.07	-49.03	1	1.54	2020-04-10	2020-10-08	7.95	12.27
SERMEQ_KUJALLEQ02	70.09	-48.94	1	1.95	2020-04-10	2020-10-08	6.92	13.48
STEENSTRUP-DIETRICHSON01	75.47	-56.23	2	2.33	2019-04-02	2019-12-06	5.37	12.51
STEENSTRUP-DIETRICHSON02	75.55	-56.33	4	2.51	2019-05-10	2019-08-09	-8.24	-20.69
STEENSTRUP-DIETRICHSON03	75.61	-57	1	0.65	2020-06-09	2020-09-08	18.35	12
STEENSTRUP-DIETRICHSON04	75.65	-56.88	1		2019-04-11	2020-01-08	5.69
					2020-04-08	2020-07-08	-40.78
					2020-07-08	2020-10-07	14.82
STEENSTRUP-DIETRICHSON05	75.64	-56.91	1		2020-03-10	2020-06-09	-26.11
STORE_GLETSCHER01	70.41	-49.33	1	0.79	2019-05-15	2019-08-14	16.97	13.41
					2019-08-14	2019-11-13	-30.02	-23.72
					2019-11-13	2020-11-10	5.74	4.52
STORE_GLETSCHER02	70.44	-49.47	2	4.29	2019-06-17	2019-12-15	-29.73	-127.69
					2019-12-15	2020-09-13	9.9	42.49
SVERDRUP_GLETSCHER01	75.73	-56.98	3	2.8	2020-01-04	2020-07-04	-8.26	-23.15
USULLUUP_SERMIA01	67.78	-47.7	2	16.23	2019-06-01	2019-08-31	-92.95	-1508.16
					2020-02-29	2020-05-30	5.52	89.54
USULLUUP_SERMIA02	68.07	-48.4	2	0.36	2019-06-05	2019-12-04	-2.39	-0.86
					2020-04-13	2020-07-13	-3.1	-1.12
USULLUUP_SERMIA03	67.91	-47.84	2		2019-05-03	2019-08-02	16.05
VESTFJORD01	70.32	-30.31	1	0.27	2019-05-10	2019-11-07	-151.13	-40.44
					2019-11-07	2020-11-05	37.49	10.03
