# Supplementary material for: Subglacial lake activity beneath the ablation zone of the Greenland Ice Sheet
Source: Copernicus journal article supplement (doi:10.5194/tc-2022-122), 2022-07-04
Supplement: Supplementary file 4 [file Table S4 Time series for 51 confirmed lakes.xlsx]

## Sheet: result
Lake_name	AcqTime	Lake_elevation (m)	Buffer_elevation (m)	Height_anomaly (m)
ACADEMY01	2012-05-08	1080.54	1093.83	-13.29
ACADEMY01	2013-03-29	1083.35	1103.9	-20.55
ACADEMY01	2015-05-26	1078.69	1100.82	-22.12
ACADEMY01	2015-05-28	1079.24	1094.28	-15.05
ACADEMY01	2016-05-07	1075.52	1095.91	-20.39
ACADEMY01	2017-04-12	1083.52	1103.48	-19.96
ACADEMY01	2017-04-15	1077.32	1097.72	-20.39
ACADEMY01	2019-04-09	1077.7	1113.88	-36.18
ACADEMY01	2019-10-08	1074.29	1122.49	-48.2
ACADEMY01	2020-01-07	1076.68	1113.27	-36.59
ACADEMY01	2020-04-07	1077.27	1117.15	-39.88
ACADEMY01	2020-10-05	1077.55	1113.87	-36.32
ACADEMY02	2012-05-18	989.26	994.74	-5.48
ACADEMY02	2013-05-01	989.25	994.37	-5.12
ACADEMY02	2013-07-03	989.89	994.6	-4.71
ACADEMY02	2013-07-05	991.71	996.32	-4.61
ACADEMY02	2014-04-16	995.96	1000.85	-4.89
ACADEMY02	2015-05-21	990.14	994.3	-4.16
ACADEMY02	2015-05-28	995.36	999.75	-4.38
ACADEMY02	2016-04-11	992	998.17	-6.18
ACADEMY02	2016-05-07	988.41	994.33	-5.92
ACADEMY02	2017-04-12	995.63	1002.05	-6.42
ACADEMY02	2017-05-10	991.03	997.36	-6.34
ACADEMY02	2019-04-09	989.58	1001.81	-12.23
ACADEMY02	2019-10-08	991.49	1002.25	-10.76
ACADEMY02	2020-01-07	990.59	1002.47	-11.89
ACADEMY02	2020-04-07	990.44	1002.52	-12.09
ACADEMY02	2020-10-05	994.18	1002.76	-8.58
ACADEMY03	2012-05-08	974.75	1000.05	-25.3
ACADEMY03	2012-05-18	960.88	986.82	-25.93
ACADEMY03	2013-05-01	963.72	986.42	-22.7
ACADEMY03	2013-07-03	964.48	987.57	-23.09
ACADEMY03	2013-07-05	967.67	989.95	-22.29
ACADEMY03	2013-07-08	964.25	986.84	-22.6
ACADEMY03	2013-07-11	964.17	986.38	-22.21
ACADEMY03	2013-07-16	970.18	992.22	-22.04
ACADEMY03	2013-07-24	966.51	988.02	-21.51
ACADEMY03	2013-07-31	968.77	990.48	-21.71
ACADEMY03	2013-08-05	968.94	990.47	-21.53
ACADEMY03	2013-08-15	971.23	992.29	-21.06
ACADEMY03	2013-08-17	969.73	991.17	-21.44
ACADEMY03	2013-08-19	970.55	991.65	-21.1
ACADEMY03	2013-08-23	971.35	992.73	-21.38
ACADEMY03	2013-09-05	970.3	991.7	-21.4
ACADEMY03	2013-09-18	969.97	991.39	-21.41
ACADEMY03	2013-09-26	973.58	992.35	-18.77
ACADEMY03	2013-09-28	969.76	991.01	-21.25
ACADEMY03	2013-09-30	970.99	991.83	-20.84
ACADEMY03	2014-04-19	971.64	990.7	-19.06
ACADEMY03	2015-04-06	975.64	991.78	-16.15
ACADEMY03	2015-04-21	978.73	994.9	-16.17
ACADEMY03	2015-05-06	973.14	989.12	-15.97
ACADEMY03	2015-05-21	975.51	987.65	-12.15
ACADEMY03	2015-05-26	975.81	991.73	-15.91
ACADEMY03	2015-06-12	971.18	987.12	-15.94
ACADEMY03	2015-07-11	977.07	993.31	-16.24
ACADEMY03	2015-07-12	973.44	989.08	-15.64
ACADEMY03	2016-03-30	965.58	980.35	-14.76
ACADEMY03	2016-03-31	977.53	991.83	-14.3
ACADEMY03	2016-04-11	976.51	990.96	-14.44
ACADEMY03	2016-04-14	975.97	990.27	-14.3
ACADEMY03	2016-05-01	979.45	993.41	-13.96
ACADEMY03	2016-05-18	975.78	989.66	-13.88
ACADEMY03	2016-06-01	971.36	985.19	-13.82
ACADEMY03	2016-06-17	975.97	989.71	-13.74
ACADEMY03	2016-07-01	978.67	992.58	-13.91
ACADEMY03	2016-07-15	973.8	987.53	-13.73
ACADEMY03	2016-09-02	976.34	989.65	-13.31
ACADEMY03	2016-09-16	977.13	990.4	-13.27
ACADEMY03	2016-10-02	980.45	992.41	-11.96
ACADEMY03	2017-03-26	983.1	994.81	-11.72
ACADEMY03	2017-04-26	982.48	994.46	-11.98
ACADEMY03	2017-05-10	979.01	990.61	-11.6
ACADEMY03	2017-05-24	978.88	990.4	-11.52
ACADEMY03	2017-06-08	979.02	991.52	-12.5
ACADEMY03	2017-07-09	981.57	993.4	-11.84
ACADEMY03	2017-07-27	979.92	989.39	-9.48
ACADEMY03	2017-08-13	979.12	990.09	-10.98
ACADEMY03	2017-08-31	975.04	989.1	-14.06
ACADEMY03	2017-09-15	982.6	993.34	-10.75
ACADEMY03	2017-09-30	982.09	992.84	-10.75
ACADEMY03	2019-04-12	980.55	990.03	-9.48
ACADEMY03	2019-10-10	984.62	988.16	-3.54
ACADEMY03	2020-07-09	986.9	990.17	-3.27
ACADEMY03	2020-10-08	982.2	986.97	-4.78
ACADEMY04	2012-05-12	913.97	917.25	-3.28
ACADEMY04	2013-04-14	917.91	921.94	-4.03
ACADEMY04	2013-04-17	916.7	920.65	-3.95
ACADEMY04	2014-04-16	917.2	921.33	-4.13
ACADEMY04	2014-04-22	914.29	918.97	-4.68
ACADEMY04	2015-05-26	909.78	915.69	-5.92
ACADEMY04	2015-05-31	909.27	916.77	-7.5
ACADEMY04	2016-05-08	907.74	914.11	-6.37
ACADEMY04	2017-04-01	913.33	919.81	-6.48
ACADEMY04	2019-05-07	912.22	922.21	-9.99
ACADEMY04	2019-11-04	916.1	927.11	-11.01
ACADEMY04	2020-05-04	912.5	927.76	-15.26
ACADEMY04	2020-08-03	914.97	927.96	-12.99
ACADEMY04	2020-11-02	912.16	924.89	-12.73
ACADEMY05	2013-03-29	1290.41	1298.37	-7.96
ACADEMY05	2014-04-24	1287.32	1295.14	-7.82
ACADEMY05	2015-05-26	1285.75	1293.45	-7.7
ACADEMY05	2016-05-07	1283.82	1290.79	-6.96
ACADEMY05	2017-04-15	1284.83	1291.76	-6.93
ACADEMY05	2019-04-20	1286.78	1292.86	-6.07
ACADEMY05	2020-01-17	1286.86	1293.17	-6.3
ACADEMY05	2020-04-17	1286.83	1292.57	-5.74
ACADEMY05	2020-07-17	1286.51	1292.44	-5.93
ACADEMY05	2020-10-16	1286.47	1292.21	-5.74
HAYES_GLETSCHER_N_NN01	2014-04-24	1060.06	1071.22	-11.17
HAYES_GLETSCHER_N_NN01	2016-04-19	1061.79	1069.09	-7.3
HAYES_GLETSCHER_N_NN01	2016-05-10	1065.85	1073.49	-7.64
HAYES_GLETSCHER_N_NN01	2016-06-20	1057.67	1066.29	-8.62
HAYES_GLETSCHER_N_NN01	2016-07-14	1057.62	1065.86	-8.23
HAYES_GLETSCHER_N_NN01	2016-08-08	1063.44	1068.03	-4.59
HAYES_GLETSCHER_N_NN01	2016-09-09	1063.13	1067.89	-4.76
HAYES_GLETSCHER_N_NN01	2016-10-08	1057.12	1062.55	-5.43
HAYES_GLETSCHER_N_NN01	2016-10-14	1060.67	1066.06	-5.39
HAYES_GLETSCHER_N_NN01	2017-03-07	1061.62	1069.73	-8.11
HAYES_GLETSCHER_N_NN01	2017-03-13	1056.16	1064.32	-8.15
HAYES_GLETSCHER_N_NN01	2017-07-16	1057.34	1067.54	-10.2
HAYES_GLETSCHER_N_NN01	2017-08-05	1056.24	1065.94	-9.7
HAYES_GLETSCHER_N_NN01	2019-08-05	1050.18	1072.26	-22.08
HAYES_GLETSCHER_N_NN01	2020-02-02	1057.45	1071.07	-13.62
HAYES_GLETSCHER_N_NN01	2020-08-02	1055.79	1070.96	-15.17
HAYES_GLETSCHER_N_NN01	2020-11-01	1054.71	1070.35	-15.64
HAYES_GLETSCHER_N_NN02	2012-05-17	1061.21	1166.51	-105.29
HAYES_GLETSCHER_N_NN02	2014-04-24	1110.98	1130.93	-19.95
HAYES_GLETSCHER_N_NN02	2014-04-27	1193.84	1186.85	7
HAYES_GLETSCHER_N_NN02	2015-03-13	1138.68	1160.14	-21.46
HAYES_GLETSCHER_N_NN02	2016-04-19	1106.15	1115.99	-9.83
HAYES_GLETSCHER_N_NN02	2016-05-10	1140.73	1162.24	-21.51
HAYES_GLETSCHER_N_NN02	2016-06-20	1133.49	1155.21	-21.72
HAYES_GLETSCHER_N_NN02	2016-07-14	1133.49	1155.15	-21.66
HAYES_GLETSCHER_N_NN02	2016-08-08	1097.47	1109.42	-11.96
HAYES_GLETSCHER_N_NN02	2016-08-10	1134.97	1156.27	-21.3
HAYES_GLETSCHER_N_NN02	2016-09-09	1135.57	1156.92	-21.34
HAYES_GLETSCHER_N_NN02	2016-10-04	1129.82	1158.65	-28.83
HAYES_GLETSCHER_N_NN02	2016-10-08	1129.62	1151.38	-21.76
HAYES_GLETSCHER_N_NN02	2016-10-14	1133.94	1155.21	-21.26
HAYES_GLETSCHER_N_NN02	2017-03-07	1137.34	1158.95	-21.61
HAYES_GLETSCHER_N_NN02	2017-03-13	1132.36	1154.06	-21.7
HAYES_GLETSCHER_N_NN02	2017-07-16	1135.37	1157.04	-21.67
HAYES_GLETSCHER_N_NN02	2017-08-05	1134.18	1155.72	-21.54
HAYES_GLETSCHER_N_NN02	2019-08-05	1054.82	1172.55	-117.73
HAYES_GLETSCHER_N_NN02	2020-02-02	1066.28	1136.31	-70.02
HAYES_GLETSCHER_N_NN02	2020-08-02	1065.5	1136.62	-71.12
HAYES_GLETSCHER_N_NN02	2020-11-01	1067.26	1087.67	-20.41
HAYES_GLETSCHER_N_NN03	2012-03-03	929.54	937.64	-8.09
HAYES_GLETSCHER_N_NN03	2012-04-11	929.48	937.66	-8.17
HAYES_GLETSCHER_N_NN03	2012-04-20	927.66	935.87	-8.21
HAYES_GLETSCHER_N_NN03	2012-04-23	933.3	941.34	-8.04
HAYES_GLETSCHER_N_NN03	2012-04-27	928.7	936.85	-8.15
HAYES_GLETSCHER_N_NN03	2012-06-27	930.55	937.18	-6.62
HAYES_GLETSCHER_N_NN03	2012-07-13	931.98	938.66	-6.68
HAYES_GLETSCHER_N_NN03	2012-08-26	928.67	932.43	-3.76
HAYES_GLETSCHER_N_NN03	2013-04-10	928.14	933.95	-5.81
HAYES_GLETSCHER_N_NN03	2013-05-09	928.22	932.62	-4.41
HAYES_GLETSCHER_N_NN03	2013-05-28	928.29	931.97	-3.68
HAYES_GLETSCHER_N_NN03	2014-04-22	928.74	935.14	-6.4
HAYES_GLETSCHER_N_NN03	2014-06-04	927.78	938.1	-10.31
HAYES_GLETSCHER_N_NN03	2015-03-13	925.57	937.18	-11.61
HAYES_GLETSCHER_N_NN03	2015-04-17	924.41	937.51	-13.1
HAYES_GLETSCHER_N_NN03	2015-04-21	927.33	929.46	-2.13
HAYES_GLETSCHER_N_NN03	2015-04-24	922.56	934.46	-11.9
HAYES_GLETSCHER_N_NN03	2015-05-03	915.5	929.69	-14.19
HAYES_GLETSCHER_N_NN03	2015-05-11	922.45	936.59	-14.13
HAYES_GLETSCHER_N_NN03	2015-05-18	921.22	932.33	-11.11
HAYES_GLETSCHER_N_NN03	2015-05-29	922.95	936.33	-13.38
HAYES_GLETSCHER_N_NN03	2015-06-03	914.47	926.64	-12.17
HAYES_GLETSCHER_N_NN03	2015-06-05	926.03	939.69	-13.66
HAYES_GLETSCHER_N_NN03	2015-06-08	920.32	930.99	-10.67
HAYES_GLETSCHER_N_NN03	2015-06-11	917.44	928.94	-11.5
HAYES_GLETSCHER_N_NN03	2015-06-12	925.9	942.26	-16.36
HAYES_GLETSCHER_N_NN03	2015-06-13	923.59	940.11	-16.51
HAYES_GLETSCHER_N_NN03	2015-06-15	921.57	933.35	-11.77
HAYES_GLETSCHER_N_NN03	2015-06-19	927.81	938.36	-10.55
HAYES_GLETSCHER_N_NN03	2015-06-22	927.22	938.13	-10.91
HAYES_GLETSCHER_N_NN03	2015-06-30	951.05	949.1	1.94
HAYES_GLETSCHER_N_NN03	2015-07-05	923.82	935.85	-12.03
HAYES_GLETSCHER_N_NN03	2015-07-08	924.05	937.74	-13.7
HAYES_GLETSCHER_N_NN03	2015-07-11	927.05	935.71	-8.67
HAYES_GLETSCHER_N_NN03	2015-07-16	925.81	933.43	-7.63
HAYES_GLETSCHER_N_NN03	2015-07-17	935.47	944.25	-8.78
HAYES_GLETSCHER_N_NN03	2015-07-18	928.34	937.62	-9.28
HAYES_GLETSCHER_N_NN03	2015-07-24	926.42	936.01	-9.59
HAYES_GLETSCHER_N_NN03	2015-07-25	926.29	937.9	-11.61
HAYES_GLETSCHER_N_NN03	2015-07-27	928.97	939.57	-10.6
HAYES_GLETSCHER_N_NN03	2015-07-28	923.28	932.7	-9.42
HAYES_GLETSCHER_N_NN03	2015-07-29	928.23	938.06	-9.83
HAYES_GLETSCHER_N_NN03	2015-07-30	931.55	942.04	-10.5
HAYES_GLETSCHER_N_NN03	2015-07-31	927.93	937.34	-9.41
HAYES_GLETSCHER_N_NN03	2015-08-01	923.23	938.14	-14.91
HAYES_GLETSCHER_N_NN03	2016-04-19	927.52	945.84	-18.32
HAYES_GLETSCHER_N_NN03	2016-04-27	925.09	933.2	-8.11
HAYES_GLETSCHER_N_NN03	2016-06-02	922.21	936.99	-14.78
HAYES_GLETSCHER_N_NN03	2016-08-08	936.14	936.15	-0.01
HAYES_GLETSCHER_N_NN03	2016-08-10	925.87	933.47	-7.6
HAYES_GLETSCHER_N_NN03	2016-08-17	925.91	933.67	-7.75
HAYES_GLETSCHER_N_NN03	2016-09-12	926.3	934.13	-7.83
HAYES_GLETSCHER_N_NN03	2017-03-21	925.42	930.28	-4.86
HAYES_GLETSCHER_N_NN03	2017-03-24	927.64	935.59	-7.95
HAYES_GLETSCHER_N_NN03	2017-05-09	924.94	940.94	-16
HAYES_GLETSCHER_N_NN03	2017-06-28	922.55	922.86	-0.31
HAYES_GLETSCHER_N_NN03	2017-07-19	928.01	930.68	-2.67
HAYES_GLETSCHER_N_NN03	2017-07-24	924.57	932.82	-8.24
HAYES_GLETSCHER_N_NN03	2017-08-04	924.16	931.62	-7.47
HAYES_GLETSCHER_N_NN03	2019-03-29	923.72	928.38	-4.66
HAYES_GLETSCHER_N_NN03	2019-09-27	913.2	934.77	-21.57
HAYES_GLETSCHER_N_NN03	2019-12-27	916.54	936	-19.46
HAYES_GLETSCHER_N_NN03	2020-03-27	918.81	936.37	-17.56
HAYES_GLETSCHER_N_NN03	2020-06-26	918.93	941.59	-22.66
HAYES_GLETSCHER_N_NN03	2020-09-24	923.33	935.55	-12.22
HAYES_GLETSCHER_N_NN04	2012-07-13	930.41	950.42	-20.01
HAYES_GLETSCHER_N_NN04	2014-03-09	931.66	949.28	-17.62
HAYES_GLETSCHER_N_NN04	2016-03-26	923.14	944.96	-21.83
HAYES_GLETSCHER_N_NN04	2017-05-04	923.03	945.29	-22.26
HAYES_GLETSCHER_N_NN04	2017-05-12	923.43	945.49	-22.06
HAYES_GLETSCHER_N_NN04	2017-05-13	924.12	946.33	-22.21
HAYES_GLETSCHER_N_NN04	2017-05-15	922.09	944.02	-21.93
HAYES_GLETSCHER_N_NN04	2017-06-15	924.77	946.79	-22.03
HAYES_GLETSCHER_N_NN04	2017-06-20	922.42	944.42	-22
HAYES_GLETSCHER_N_NN04	2017-06-23	928.29	950.27	-21.98
HAYES_GLETSCHER_N_NN04	2017-06-26	923.09	945.09	-22
HAYES_GLETSCHER_N_NN04	2017-06-27	923.93	945.82	-21.89
HAYES_GLETSCHER_N_NN04	2017-07-03	928.16	950.06	-21.89
HAYES_GLETSCHER_N_NN04	2017-07-04	926.35	948.23	-21.88
HAYES_GLETSCHER_N_NN04	2017-07-05	923.5	945.46	-21.97
HAYES_GLETSCHER_N_NN04	2017-07-06	930.53	952.42	-21.89
HAYES_GLETSCHER_N_NN04	2017-07-07	924.63	946.56	-21.93
HAYES_GLETSCHER_N_NN04	2017-07-15	928.34	950.41	-22.07
HAYES_GLETSCHER_N_NN04	2017-07-16	924.38	946.35	-21.98
HAYES_GLETSCHER_N_NN04	2017-07-19	923.85	945.78	-21.94
HAYES_GLETSCHER_N_NN04	2017-07-23	927.74	949.72	-21.97
HAYES_GLETSCHER_N_NN04	2017-07-25	925.97	947.86	-21.89
HAYES_GLETSCHER_N_NN04	2017-07-28	921.22	942.62	-21.39
HAYES_GLETSCHER_N_NN04	2017-08-04	927.19	946.47	-19.28
HAYES_GLETSCHER_N_NN04	2017-08-17	928.41	946.8	-18.39
HAYES_GLETSCHER_N_NN04	2017-08-18	925.22	943.76	-18.54
HAYES_GLETSCHER_N_NN04	2017-08-19	926.18	944.86	-18.68
HAYES_GLETSCHER_N_NN04	2017-08-20	927.9	946.72	-18.82
HAYES_GLETSCHER_N_NN04	2017-08-22	927.53	946.13	-18.6
HAYES_GLETSCHER_N_NN04	2017-08-23	927.91	946.67	-18.76
HAYES_GLETSCHER_N_NN04	2017-08-25	932.86	951.09	-18.23
HAYES_GLETSCHER_N_NN04	2017-08-26	923.84	942.25	-18.41
HAYES_GLETSCHER_N_NN04	2017-09-05	925.23	943.58	-18.35
HAYES_GLETSCHER_N_NN04	2017-09-07	923.33	941.58	-18.25
HAYES_GLETSCHER_N_NN04	2017-09-08	927.34	945.7	-18.37
HAYES_GLETSCHER_N_NN04	2017-09-26	930.27	939.23	-8.96
HAYES_GLETSCHER_N_NN04	2017-09-27	934.12	952.55	-18.43
HAYES_GLETSCHER_N_NN04	2017-10-01	930.4	949.23	-18.82
HAYES_GLETSCHER_N_NN04	2019-04-02	922.95	935.09	-12.14
HAYES_GLETSCHER_N_NN04	2019-10-01	929.72	934.85	-5.13
HAYES_GLETSCHER_N_NN04	2019-12-31	915.13	931.45	-16.33
ICE_CAPS_NE01	2012-05-03	611.93	632.97	-21.04
ICE_CAPS_NE01	2012-05-11	615.86	636.81	-20.95
ICE_CAPS_NE01	2012-05-17	615.06	635.96	-20.89
ICE_CAPS_NE01	2012-05-31	652.9	668.96	-16.06
ICE_CAPS_NE01	2012-06-15	610.36	628.75	-18.39
ICE_CAPS_NE01	2012-07-10	611.35	630.34	-18.99
ICE_CAPS_NE01	2012-07-17	615.19	634.36	-19.17
ICE_CAPS_NE01	2012-07-19	613.07	632.14	-19.07
ICE_CAPS_NE01	2012-07-20	612.79	629.54	-16.74
ICE_CAPS_NE01	2012-07-27	611.95	631.1	-19.16
ICE_CAPS_NE01	2012-07-31	619.59	637.61	-18.02
ICE_CAPS_NE01	2012-08-07	620.46	638.99	-18.53
ICE_CAPS_NE01	2012-08-14	612.65	629.76	-17.11
ICE_CAPS_NE01	2012-08-17	613.69	629.63	-15.93
ICE_CAPS_NE01	2013-03-29	630.72	645.78	-15.06
ICE_CAPS_NE01	2013-05-05	623.15	638.15	-14.99
ICE_CAPS_NE01	2013-05-26	602.64	623.08	-20.43
ICE_CAPS_NE01	2013-07-24	630.89	645.24	-14.36
ICE_CAPS_NE01	2013-07-26	626.66	641.1	-14.44
ICE_CAPS_NE01	2013-07-29	621.94	636.36	-14.43
ICE_CAPS_NE01	2013-08-13	620.2	634.54	-14.34
ICE_CAPS_NE01	2013-08-31	627	641.11	-14.11
ICE_CAPS_NE01	2014-03-24	630.55	643.42	-12.86
ICE_CAPS_NE01	2014-03-29	637.91	650.82	-12.91
ICE_CAPS_NE01	2014-04-13	628.16	641.06	-12.91
ICE_CAPS_NE01	2014-04-29	635.62	648.38	-12.76
ICE_CAPS_NE01	2014-05-13	637.61	650.96	-13.35
ICE_CAPS_NE01	2014-06-05	594.47	601.35	-6.88
ICE_CAPS_NE01	2014-06-15	628.56	640.93	-12.37
ICE_CAPS_NE01	2014-07-10	631.36	643.89	-12.53
ICE_CAPS_NE01	2014-08-07	629.77	641.61	-11.83
ICE_CAPS_NE01	2014-09-01	635.33	646.28	-10.95
ICE_CAPS_NE01	2014-09-18	629.36	636.15	-6.79
ICE_CAPS_NE01	2015-03-22	644.43	656.67	-12.25
ICE_CAPS_NE01	2015-04-11	638.89	648.48	-9.59
ICE_CAPS_NE01	2015-04-17	639.94	649.46	-9.52
ICE_CAPS_NE01	2015-04-18	642.27	650.54	-8.27
ICE_CAPS_NE01	2015-04-20	638.5	648.06	-9.56
ICE_CAPS_NE01	2015-05-01	639.53	648.86	-9.33
ICE_CAPS_NE01	2015-05-15	641.49	648.33	-6.83
ICE_CAPS_NE01	2015-05-22	636.37	645.86	-9.49
ICE_CAPS_NE01	2015-06-06	637.91	647.36	-9.45
ICE_CAPS_NE01	2015-06-20	639.66	649.04	-9.39
ICE_CAPS_NE01	2015-07-31	640.26	649.44	-9.19
ICE_CAPS_NE01	2015-08-14	640.22	648.71	-8.5
ICE_CAPS_NE01	2015-09-07	636.5	644.59	-8.09
ICE_CAPS_NE01	2016-03-30	645.2	652.21	-7.01
ICE_CAPS_NE01	2016-04-01	653.02	660.66	-7.64
ICE_CAPS_NE01	2016-05-05	645.18	652.1	-6.92
ICE_CAPS_NE01	2016-05-19	648.14	654.99	-6.86
ICE_CAPS_NE01	2016-06-23	647.21	654.03	-6.82
ICE_CAPS_NE01	2016-07-08	647.98	654.75	-6.77
ICE_CAPS_NE01	2016-07-26	643.96	650.36	-6.4
ICE_CAPS_NE01	2016-08-15	647.92	652.82	-4.91
ICE_CAPS_NE01	2016-09-04	652.72	657.22	-4.5
ICE_CAPS_NE01	2016-09-23	650.22	654.72	-4.49
ICE_CAPS_NE01	2016-10-08	652.75	657.07	-4.32
ICE_CAPS_NE01	2017-03-16	654.01	657.6	-3.59
ICE_CAPS_NE01	2017-03-25	656.01	662.23	-6.22
ICE_CAPS_NE01	2017-04-08	655.15	659.04	-3.89
ICE_CAPS_NE01	2019-04-08	660.72	662.57	-1.85
ICE_CAPS_NE01	2020-01-06	655.46	661.28	-5.82
ICE_CAPS_NE01	2020-04-06	656.14	661.93	-5.79
ICE_CAPS_NE01	2020-10-04	651.2	661.6	-10.4
ILLULLIP_SERMIA01	2012-03-31	1260.81	1271.21	-10.4
ILLULLIP_SERMIA01	2012-06-02	1240.87	1257.45	-16.59
ILLULLIP_SERMIA01	2013-05-07	1247.94	1266.8	-18.86
ILLULLIP_SERMIA01	2013-07-09	1263.37	1286.52	-23.15
ILLULLIP_SERMIA01	2014-04-27	1262.99	1270.01	-7.02
ILLULLIP_SERMIA01	2014-05-21	1253.26	1264.87	-11.62
ILLULLIP_SERMIA01	2015-03-02	1245.48	1258.9	-13.42
ILLULLIP_SERMIA01	2015-03-12	1262.16	1269.05	-6.89
ILLULLIP_SERMIA01	2016-03-23	1236.62	1243.59	-6.97
ILLULLIP_SERMIA01	2017-05-12	1271.24	1274.6	-3.36
ILLULLIP_SERMIA01	2017-05-13	1256.31	1266.28	-9.97
ILLULLIP_SERMIA01	2017-05-26	1253.91	1263.98	-10.08
ILLULLIP_SERMIA01	2017-05-30	1253.14	1262.89	-9.75
ILLULLIP_SERMIA01	2017-05-31	1253.06	1262.85	-9.79
ILLULLIP_SERMIA01	2017-06-14	1256.99	1263.83	-6.84
ILLULLIP_SERMIA01	2017-06-19	1271.56	1275.28	-3.72
ILLULLIP_SERMIA01	2017-06-23	1252.28	1261.77	-9.49
ILLULLIP_SERMIA01	2017-07-03	1262.56	1268.77	-6.2
ILLULLIP_SERMIA01	2017-07-07	1254.77	1261.68	-6.9
ILLULLIP_SERMIA01	2017-07-09	1267.75	1273.31	-5.56
ILLULLIP_SERMIA01	2017-07-17	1251.52	1259.21	-7.69
ILLULLIP_SERMIA01	2017-07-18	1260.95	1267.91	-6.95
ILLULLIP_SERMIA01	2017-07-24	1258.81	1266.79	-7.98
ILLULLIP_SERMIA01	2017-07-25	1252.3	1261.05	-8.76
ILLULLIP_SERMIA01	2017-07-27	1255.72	1265.86	-10.14
ILLULLIP_SERMIA01	2017-07-28	1255.26	1262.42	-7.16
ILLULLIP_SERMIA01	2017-07-31	1266.42	1271.52	-5.1
ILLULLIP_SERMIA01	2017-08-07	1257.65	1265.55	-7.9
ILLULLIP_SERMIA01	2017-08-17	1259.85	1264.97	-5.12
ILLULLIP_SERMIA01	2017-08-23	1251.67	1261.16	-9.49
ILLULLIP_SERMIA01	2017-08-24	1260.18	1269.6	-9.42
ILLULLIP_SERMIA01	2017-08-25	1260.55	1267.44	-6.88
ILLULLIP_SERMIA01	2017-09-07	1252.07	1262.15	-10.08
ILLULLIP_SERMIA01	2017-09-08	1259.04	1261.59	-2.55
ILLULLIP_SERMIA01	2017-09-21	1256.1	1263.05	-6.95
ILLULLIP_SERMIA01	2017-09-23	1260.33	1268.73	-8.4
ILLULLIP_SERMIA01	2017-09-26	1261.44	1268.54	-7.1
ILLULLIP_SERMIA01	2019-10-02	1236.39	1272.21	-35.82
ILLULLIP_SERMIA01	2020-06-30	1247.67	1267.01	-19.35
ILLULLIP_SERMIA01	2020-09-29	1242.1	1267.61	-25.51
ILLULLIP_SERMIA02	2012-03-31	1151.89	1159.7	-7.81
ILLULLIP_SERMIA02	2012-06-02	1133.64	1148.31	-14.67
ILLULLIP_SERMIA02	2013-05-07	1145.86	1154.16	-8.3
ILLULLIP_SERMIA02	2014-04-27	1145.3	1153.52	-8.22
ILLULLIP_SERMIA02	2015-03-02	1133.02	1148.32	-15.3
ILLULLIP_SERMIA02	2015-03-12	1136.34	1151.67	-15.33
ILLULLIP_SERMIA02	2016-05-10	1148.76	1155.13	-6.37
ILLULLIP_SERMIA02	2016-09-09	1147.99	1154.7	-6.71
ILLULLIP_SERMIA02	2017-03-13	1144.04	1147.27	-3.24
ILLULLIP_SERMIA02	2017-05-12	1147.18	1154.41	-7.24
ILLULLIP_SERMIA02	2017-05-13	1147.99	1155.26	-7.27
ILLULLIP_SERMIA02	2017-05-26	1146.12	1153.38	-7.26
ILLULLIP_SERMIA02	2017-05-30	1145.25	1152.51	-7.26
ILLULLIP_SERMIA02	2017-05-31	1144.78	1152.04	-7.27
ILLULLIP_SERMIA02	2017-06-14	1143.9	1151.3	-7.4
ILLULLIP_SERMIA02	2017-06-19	1147.4	1154.79	-7.4
ILLULLIP_SERMIA02	2017-06-23	1143.65	1151.03	-7.38
ILLULLIP_SERMIA02	2017-07-03	1145.75	1153.27	-7.52
ILLULLIP_SERMIA02	2017-07-05	1146.38	1149.02	-2.64
ILLULLIP_SERMIA02	2017-07-07	1144.99	1152.54	-7.56
ILLULLIP_SERMIA02	2017-07-09	1148.44	1155.9	-7.47
ILLULLIP_SERMIA02	2017-07-17	1143.09	1150.68	-7.6
ILLULLIP_SERMIA02	2017-07-18	1150.79	1158.29	-7.5
ILLULLIP_SERMIA02	2017-07-24	1149.21	1156.73	-7.52
ILLULLIP_SERMIA02	2017-07-25	1143.74	1150.46	-6.72
ILLULLIP_SERMIA02	2017-07-27	1146.86	1154.32	-7.47
ILLULLIP_SERMIA02	2017-07-28	1146.94	1154.52	-7.58
ILLULLIP_SERMIA02	2017-07-31	1146.05	1153.93	-7.88
ILLULLIP_SERMIA02	2017-08-07	1149.04	1156.31	-7.27
ILLULLIP_SERMIA02	2017-08-08	1146.84	1152.8	-5.96
ILLULLIP_SERMIA02	2017-08-17	1147.89	1155.97	-8.08
ILLULLIP_SERMIA02	2017-08-23	1145.56	1152.62	-7.06
ILLULLIP_SERMIA02	2017-08-24	1151.98	1159.05	-7.08
ILLULLIP_SERMIA02	2017-08-25	1151.11	1158.31	-7.2
ILLULLIP_SERMIA02	2017-09-07	1143.46	1150.62	-7.15
ILLULLIP_SERMIA02	2017-09-08	1151.38	1158.53	-7.15
ILLULLIP_SERMIA02	2017-09-21	1147	1154.19	-7.19
ILLULLIP_SERMIA02	2017-09-23	1151.94	1159.19	-7.25
ILLULLIP_SERMIA02	2017-09-26	1153.15	1160.43	-7.28
ILLULLIP_SERMIA02	2019-10-22	1132.75	1167.87	-35.12
ILLULLIP_SERMIA02	2020-01-21	1134.1	1159.37	-25.28
ILLULLIP_SERMIA02	2020-10-19	1133.82	1146.21	-12.39
ILLULLIP_SERMIA03	2012-03-31	1159.56	1170.03	-10.47
ILLULLIP_SERMIA03	2012-06-02	1150.18	1160.97	-10.78
ILLULLIP_SERMIA03	2013-05-07	1151.26	1163.59	-12.33
ILLULLIP_SERMIA03	2014-04-27	1151.15	1163.31	-12.16
ILLULLIP_SERMIA03	2015-03-02	1142.07	1158.58	-16.51
ILLULLIP_SERMIA03	2015-03-12	1145.61	1162.17	-16.56
ILLULLIP_SERMIA03	2016-05-10	1168.58	1176.96	-8.38
ILLULLIP_SERMIA03	2016-09-09	1157.58	1163.24	-5.66
ILLULLIP_SERMIA03	2017-05-12	1155.78	1165.11	-9.33
ILLULLIP_SERMIA03	2017-05-13	1156.59	1165.88	-9.29
ILLULLIP_SERMIA03	2017-05-26	1154.46	1163.76	-9.31
ILLULLIP_SERMIA03	2017-05-30	1153.93	1163.28	-9.35
ILLULLIP_SERMIA03	2017-05-31	1153.47	1162.76	-9.29
ILLULLIP_SERMIA03	2017-06-14	1152.27	1161.69	-9.43
ILLULLIP_SERMIA03	2017-06-19	1156.01	1165.44	-9.42
ILLULLIP_SERMIA03	2017-06-23	1152.12	1161.56	-9.44
ILLULLIP_SERMIA03	2017-07-03	1154.4	1163.95	-9.55
ILLULLIP_SERMIA03	2017-07-05	1154.85	1161.17	-6.32
ILLULLIP_SERMIA03	2017-07-07	1154.21	1163.69	-9.48
ILLULLIP_SERMIA03	2017-07-09	1156.53	1166.16	-9.63
ILLULLIP_SERMIA03	2017-07-17	1151.97	1161.61	-9.64
ILLULLIP_SERMIA03	2017-07-18	1159.54	1168.97	-9.43
ILLULLIP_SERMIA03	2017-07-24	1157.29	1166.9	-9.61
ILLULLIP_SERMIA03	2017-07-25	1152.5	1161.8	-9.3
ILLULLIP_SERMIA03	2017-07-27	1155.56	1164.99	-9.43
ILLULLIP_SERMIA03	2017-07-28	1155.34	1164.91	-9.57
ILLULLIP_SERMIA03	2017-07-31	1155.12	1164.2	-9.08
ILLULLIP_SERMIA03	2017-08-07	1157.79	1167.01	-9.21
ILLULLIP_SERMIA03	2017-08-08	1156.61	1168.58	-11.97
ILLULLIP_SERMIA03	2017-08-17	1156.24	1165.45	-9.22
ILLULLIP_SERMIA03	2017-08-23	1154.13	1163.28	-9.15
ILLULLIP_SERMIA03	2017-08-24	1160.68	1169.8	-9.11
ILLULLIP_SERMIA03	2017-08-25	1159.78	1169.03	-9.24
ILLULLIP_SERMIA03	2017-09-07	1152.18	1161.45	-9.27
ILLULLIP_SERMIA03	2017-09-08	1160.18	1169.12	-8.94
ILLULLIP_SERMIA03	2017-09-21	1155.37	1164.71	-9.34
ILLULLIP_SERMIA03	2017-09-23	1160.31	1169.69	-9.38
ILLULLIP_SERMIA03	2017-09-26	1161.77	1171.15	-9.38
ILLULLIP_SERMIA03	2019-05-22	1143.64	1168.67	-25.03
ILLULLIP_SERMIA03	2019-11-20	1145.25	1172.5	-27.26
ILLULLIP_SERMIA03	2020-02-19	1146.09	1167.68	-21.59
ILLULLIP_SERMIA03	2020-05-20	1146.69	1168.96	-22.27
INUPPAAT_QUUAT01	2011-10-28	1345.81	1362.94	-17.13
INUPPAAT_QUUAT01	2013-07-05	1358.18	1373.84	-15.66
INUPPAAT_QUUAT01	2015-02-26	1364.45	1377.06	-12.61
INUPPAAT_QUUAT01	2015-03-19	1367.71	1380.19	-12.48
INUPPAAT_QUUAT01	2015-06-04	1364.15	1376.25	-12.1
INUPPAAT_QUUAT01	2015-07-19	1361.89	1373.84	-11.94
INUPPAAT_QUUAT01	2015-09-14	1366.42	1377.05	-10.63
INUPPAAT_QUUAT01	2016-05-18	1361.87	1374.16	-12.29
INUPPAAT_QUUAT01	2016-06-05	1367.01	1377.34	-10.32
INUPPAAT_QUUAT01	2016-07-22	1364.58	1374.56	-9.98
INUPPAAT_QUUAT01	2016-08-30	1364.61	1374.46	-9.84
INUPPAAT_QUUAT01	2016-10-07	1367.69	1377.38	-9.69
INUPPAAT_QUUAT01	2016-11-24	1365.18	1374.69	-9.51
INUPPAAT_QUUAT01	2017-04-05	1365.87	1374.68	-8.8
INUPPAAT_QUUAT01	2017-05-11	1364.02	1372.49	-8.47
INUPPAAT_QUUAT01	2017-07-22	1376.6	1382.87	-6.27
INUPPAAT_QUUAT01	2017-08-28	1370.3	1379.66	-9.36
INUPPAAT_QUUAT01	2017-09-04	1366.94	1375.14	-8.2
INUPPAAT_QUUAT01	2017-09-05	1366.97	1375.47	-8.5
INUPPAAT_QUUAT01	2019-05-07	1369.12	1380.36	-11.23
INUPPAAT_QUUAT01	2020-02-04	1370.15	1379.03	-8.88
INUPPAAT_QUUAT01	2020-11-02	1372.33	1379.13	-6.79
INUPPAAT_QUUAT02	2013-07-16	1659.66	1667.33	-7.66
INUPPAAT_QUUAT02	2015-05-07	1660.7	1667.67	-6.96
INUPPAAT_QUUAT02	2016-09-21	1663.79	1671.03	-7.24
INUPPAAT_QUUAT02	2017-03-11	1658.23	1665.79	-7.56
INUPPAAT_QUUAT02	2019-10-11	1659.02	1668.31	-9.29
INUPPAAT_QUUAT02	2020-04-09	1646.47	1667.48	-21.01
INUPPAAT_QUUAT02	2020-10-08	1638.88	1671.92	-33.04
JAKOBSHAVN_ISBRAE01	2010-05-30	1643.75	1650.86	-7.11
JAKOBSHAVN_ISBRAE01	2010-09-28	1653.88	1660.52	-6.63
JAKOBSHAVN_ISBRAE01	2012-06-10	1646.8	1651.69	-4.89
JAKOBSHAVN_ISBRAE01	2012-07-26	1647.17	1650.85	-3.68
JAKOBSHAVN_ISBRAE01	2013-06-10	1649.13	1652.92	-3.79
JAKOBSHAVN_ISBRAE01	2015-05-15	1639.37	1643.59	-4.22
JAKOBSHAVN_ISBRAE01	2016-09-09	1647.21	1651.13	-3.92
JAKOBSHAVN_ISBRAE01	2016-09-21	1645.32	1649.18	-3.86
JAKOBSHAVN_ISBRAE01	2017-04-30	1641.41	1645.67	-4.26
JAKOBSHAVN_ISBRAE01	2017-05-27	1627.05	1633.5	-6.45
JAKOBSHAVN_ISBRAE01	2019-06-01	1630.69	1645.89	-15.2
JAKOBSHAVN_ISBRAE01	2019-08-31	1632.85	1644.9	-12.05
JAKOBSHAVN_ISBRAE01	2019-11-30	1633.27	1645.15	-11.88
JAKOBSHAVN_ISBRAE01	2020-02-29	1632.91	1644.65	-11.75
JAKOBSHAVN_ISBRAE01	2020-05-30	1633.06	1644.99	-11.92
JAKOBSHAVN_ISBRAE01	2020-08-28	1632.94	1644.7	-11.76
JAKOBSHAVN_ISBRAE01	2020-11-27	1633.2	1644.94	-11.75
JAKOBSHAVN_ISBRAE02	2010-06-17	1417.53	1424.75	-7.22
JAKOBSHAVN_ISBRAE02	2013-02-20	1411.72	1420.96	-9.24
JAKOBSHAVN_ISBRAE02	2013-05-13	1400.47	1409.58	-9.11
JAKOBSHAVN_ISBRAE02	2014-06-21	1407.16	1414.4	-7.24
JAKOBSHAVN_ISBRAE02	2015-05-26	1409.25	1414.55	-5.3
JAKOBSHAVN_ISBRAE02	2015-06-03	1412.82	1418.15	-5.32
JAKOBSHAVN_ISBRAE02	2015-10-24	1411.24	1415.59	-4.36
JAKOBSHAVN_ISBRAE02	2016-02-06	1411.86	1416.7	-4.84
JAKOBSHAVN_ISBRAE02	2016-03-15	1411.26	1422.34	-11.08
JAKOBSHAVN_ISBRAE02	2017-03-12	1407.1	1418.41	-11.31
JAKOBSHAVN_ISBRAE02	2019-06-05	1403.18	1415.46	-12.28
JAKOBSHAVN_ISBRAE02	2019-12-04	1403.54	1420.15	-16.62
JAKOBSHAVN_ISBRAE02	2020-03-04	1396.26	1413.21	-16.95
JAKOBSHAVN_ISBRAE03	2013-02-20	1371.2	1388.17	-16.97
JAKOBSHAVN_ISBRAE03	2013-03-23	1367.55	1379.29	-11.74
JAKOBSHAVN_ISBRAE03	2013-05-13	1359.7	1376.49	-16.79
JAKOBSHAVN_ISBRAE03	2013-05-31	1370.15	1378.69	-8.54
JAKOBSHAVN_ISBRAE03	2013-06-06	1366.9	1375.9	-9
JAKOBSHAVN_ISBRAE03	2013-07-16	1365.9	1374.11	-8.22
JAKOBSHAVN_ISBRAE03	2013-08-04	1373.52	1381.98	-8.45
JAKOBSHAVN_ISBRAE03	2013-08-19	1366.52	1373.52	-7
JAKOBSHAVN_ISBRAE03	2014-10-06	1369.13	1380.91	-11.78
JAKOBSHAVN_ISBRAE03	2015-05-26	1362	1378.47	-16.47
JAKOBSHAVN_ISBRAE03	2015-06-03	1365.58	1382.02	-16.45
JAKOBSHAVN_ISBRAE03	2015-06-17	1362.84	1372.94	-10.1
JAKOBSHAVN_ISBRAE03	2015-10-24	1368.68	1379.7	-11.03
JAKOBSHAVN_ISBRAE03	2016-02-06	1369.29	1380.88	-11.59
JAKOBSHAVN_ISBRAE03	2016-03-15	1368.38	1380	-11.62
JAKOBSHAVN_ISBRAE03	2019-05-07	1352.81	1371.53	-18.72
JAKOBSHAVN_ISBRAE03	2020-02-04	1350.92	1370.69	-19.77
JAKOBSHAVN_ISBRAE03	2020-08-03	1352.25	1370	-17.74
JAKOBSHAVN_ISBRAE03	2020-11-02	1359.27	1370.39	-11.12
JAKOBSHAVN_ISBRAE04	2012-06-30	1428.2	1432.32	-4.12
JAKOBSHAVN_ISBRAE04	2013-02-20	1431.54	1436.12	-4.58
JAKOBSHAVN_ISBRAE04	2013-05-13	1422.3	1424.05	-1.75
JAKOBSHAVN_ISBRAE04	2013-07-05	1428.34	1432.78	-4.44
JAKOBSHAVN_ISBRAE04	2015-05-26	1437.3	1440.66	-3.36
JAKOBSHAVN_ISBRAE04	2015-06-03	1429.08	1431.65	-2.57
JAKOBSHAVN_ISBRAE04	2015-10-24	1426.99	1429.02	-2.03
JAKOBSHAVN_ISBRAE04	2016-02-06	1428.24	1430.73	-2.49
JAKOBSHAVN_ISBRAE04	2016-03-15	1427.22	1429.93	-2.71
JAKOBSHAVN_ISBRAE04	2017-03-12	1422.79	1427.93	-5.14
JAKOBSHAVN_ISBRAE04	2017-09-09	1416.36	1419.07	-2.71
JAKOBSHAVN_ISBRAE04	2019-04-12	1412.92	1424.77	-11.85
JAKOBSHAVN_ISBRAE04	2019-10-11	1411.18	1422.75	-11.57
JAKOBSHAVN_ISBRAE04	2020-04-09	1411.04	1423.39	-12.35
JAKOBSHAVN_ISBRAE04	2020-10-08	1411.14	1421.42	-10.28
JAKOBSHAVN_ISBRAE05	2012-06-30	1470.45	1471.41	-0.96
JAKOBSHAVN_ISBRAE05	2012-07-22	1469.2	1471.41	-2.22
JAKOBSHAVN_ISBRAE05	2013-07-05	1459.9	1464.8	-4.9
JAKOBSHAVN_ISBRAE05	2015-02-19	1463.39	1467.94	-4.55
JAKOBSHAVN_ISBRAE05	2015-05-26	1469.08	1472.36	-3.28
JAKOBSHAVN_ISBRAE05	2015-10-20	1462.71	1468.31	-5.59
JAKOBSHAVN_ISBRAE05	2016-06-09	1460.33	1465.26	-4.93
JAKOBSHAVN_ISBRAE05	2017-03-12	1465.52	1467.35	-1.82
JAKOBSHAVN_ISBRAE05	2017-04-29	1458.66	1460.67	-2.01
JAKOBSHAVN_ISBRAE05	2017-07-09	1458.98	1460.91	-1.92
JAKOBSHAVN_ISBRAE05	2019-04-04	1444.37	1461.2	-16.84
JAKOBSHAVN_ISBRAE05	2020-01-02	1454.1	1460.34	-6.23
JAKOBSHAVN_ISBRAE05	2020-04-02	1454.21	1460.48	-6.28
JAKOBSHAVN_ISBRAE05	2020-07-02	1452.15	1460.12	-7.97
JAKOBSHAVN_ISBRAE05	2020-09-30	1451.85	1459.86	-8.01
KAKIVFAAT_SERMIAT01	2012-03-30	1244.84	1250.73	-5.89
KAKIVFAAT_SERMIAT01	2012-04-12	1270.47	1276.5	-6.03
KAKIVFAAT_SERMIAT01	2013-03-31	1277.08	1279.28	-2.2
KAKIVFAAT_SERMIAT01	2013-04-11	1267.44	1273.68	-6.24
KAKIVFAAT_SERMIAT01	2014-06-08	1272.39	1277.99	-5.6
KAKIVFAAT_SERMIAT01	2015-03-31	1272.72	1278.48	-5.76
KAKIVFAAT_SERMIAT01	2016-05-29	1267.69	1273.71	-6.02
KAKIVFAAT_SERMIAT01	2017-05-22	1261.24	1273.39	-12.16
KAKIVFAAT_SERMIAT01	2017-05-24	1266.17	1274.5	-8.34
KAKIVFAAT_SERMIAT01	2019-04-15	1264.2	1281.06	-16.86
KAKIVFAAT_SERMIAT01	2019-10-14	1264.54	1277.6	-13.06
KAKIVFAAT_SERMIAT01	2020-01-13	1266.5	1279.79	-13.29
KAKIVFAAT_SERMIAT01	2020-07-13	1268.31	1281.28	-12.97
KAKIVFAAT_SERMIAT01	2020-10-11	1266.16	1279.5	-13.34
KANGIATA_NUNAATA_SERMIA01	2013-07-14	1566.12	1574.18	-8.06
KANGIATA_NUNAATA_SERMIA01	2014-07-01	1566.61	1570.28	-3.67
KANGIATA_NUNAATA_SERMIA01	2014-10-05	1564.64	1573.1	-8.46
KANGIATA_NUNAATA_SERMIA01	2015-05-20	1563.83	1567.13	-3.3
KANGIATA_NUNAATA_SERMIA01	2015-06-11	1564.12	1571.71	-7.59
KANGIATA_NUNAATA_SERMIA01	2015-06-24	1561.23	1568.77	-7.54
KANGIATA_NUNAATA_SERMIA01	2016-07-01	1561.99	1569.58	-7.59
KANGIATA_NUNAATA_SERMIA01	2017-07-17	1563.12	1569.41	-6.29
KANGIATA_NUNAATA_SERMIA01	2017-07-25	1565.16	1571	-5.84
KANGIATA_NUNAATA_SERMIA01	2019-06-01	1567.32	1568.65	-1.33
KANGIATA_NUNAATA_SERMIA01	2019-08-31	1555.52	1565.8	-10.28
KANGIATA_NUNAATA_SERMIA01	2019-11-30	1556.52	1566.25	-9.72
KANGIATA_NUNAATA_SERMIA01	2020-02-29	1557.41	1566.67	-9.25
KANGIATA_NUNAATA_SERMIA01	2020-05-30	1558.45	1566.97	-8.52
KANGILINNGUATA_SERMIA01	2013-07-05	1661.15	1666.57	-5.42
KANGILINNGUATA_SERMIA01	2013-07-06	1661.09	1666.58	-5.49
KANGILINNGUATA_SERMIA01	2014-07-30	1668.19	1672.19	-4.01
KANGILINNGUATA_SERMIA01	2014-11-01	1664.28	1669.81	-5.54
KANGILINNGUATA_SERMIA01	2015-06-11	1667.16	1671.06	-3.9
KANGILINNGUATA_SERMIA01	2015-06-24	1664.68	1669.48	-4.79
KANGILINNGUATA_SERMIA01	2016-08-19	1669.22	1673.12	-3.9
KANGILINNGUATA_SERMIA01	2017-08-26	1667.67	1671.48	-3.81
KANGILINNGUATA_SERMIA01	2019-08-02	1669.92	1671.24	-1.32
KANGILINNGUATA_SERMIA01	2019-11-01	1670.61	1671.47	-0.86
KANGILINNGUATA_SERMIA01	2020-05-01	1670.74	1670.87	-0.13
KANGILINNGUATA_SERMIA01	2020-10-29	1670.77	1671.71	-0.95
KJER_GLETSCHER01	2012-08-03	1001.98	1025.12	-23.14
KJER_GLETSCHER01	2013-05-28	1006.74	1028.29	-21.55
KJER_GLETSCHER01	2014-03-08	1011.42	1030.89	-19.47
KJER_GLETSCHER01	2014-03-09	1009.18	1028.22	-19.03
KJER_GLETSCHER01	2015-04-11	1005.71	1024.05	-18.34
KJER_GLETSCHER01	2015-04-15	1004.83	1023.12	-18.29
KJER_GLETSCHER01	2015-04-16	1006.24	1024.97	-18.73
KJER_GLETSCHER01	2016-03-26	1003.26	1023.49	-20.23
KJER_GLETSCHER01	2017-04-29	1008.77	1025.7	-16.93
KJER_GLETSCHER01	2017-05-04	1007.56	1024.54	-16.98
KJER_GLETSCHER01	2017-05-09	1005.79	1022.88	-17.09
KJER_GLETSCHER01	2017-05-12	1008.37	1025.42	-17.05
KJER_GLETSCHER01	2017-05-13	1009.13	1026.14	-17
KJER_GLETSCHER01	2017-05-15	1006.03	1023.17	-17.14
KJER_GLETSCHER01	2017-06-15	1009.36	1026.56	-17.2
KJER_GLETSCHER01	2017-06-20	1007.04	1024.16	-17.11
KJER_GLETSCHER01	2017-06-23	1012.94	1030.16	-17.22
KJER_GLETSCHER01	2017-06-26	1006.7	1023.97	-17.27
KJER_GLETSCHER01	2017-06-27	1007.75	1025.04	-17.29
KJER_GLETSCHER01	2017-07-03	1011.91	1029.16	-17.24
KJER_GLETSCHER01	2017-07-04	1009.52	1025.93	-16.41
KJER_GLETSCHER01	2017-07-05	1008.39	1025.6	-17.21
KJER_GLETSCHER01	2017-07-06	1013.98	1032.64	-18.66
KJER_GLETSCHER01	2017-07-07	1008.87	1024.73	-15.86
KJER_GLETSCHER01	2017-07-13	1008.21	1023.41	-15.2
KJER_GLETSCHER01	2017-07-15	1013.48	1030.77	-17.29
KJER_GLETSCHER01	2017-07-16	1008.38	1025.72	-17.34
KJER_GLETSCHER01	2017-07-19	1006.94	1024.41	-17.47
KJER_GLETSCHER01	2017-07-23	1012.53	1029.82	-17.3
KJER_GLETSCHER01	2017-07-25	1009.41	1026.75	-17.34
KJER_GLETSCHER01	2017-07-28	1005.39	1021.51	-16.13
KJER_GLETSCHER01	2017-08-04	1009.05	1025.81	-16.76
KJER_GLETSCHER01	2017-08-17	1012.63	1027.74	-15.11
KJER_GLETSCHER01	2017-08-18	1009.27	1024.28	-15.01
KJER_GLETSCHER01	2017-08-19	1009.8	1024.8	-15
KJER_GLETSCHER01	2017-08-20	1012.13	1027.01	-14.87
KJER_GLETSCHER01	2017-08-22	1011.42	1026.37	-14.94
KJER_GLETSCHER01	2017-08-23	1011.62	1026.47	-14.85
KJER_GLETSCHER01	2017-08-25	1016.48	1031.44	-14.96
KJER_GLETSCHER01	2017-08-26	1008.14	1024.14	-16
KJER_GLETSCHER01	2017-09-05	1008.26	1023.26	-14.99
KJER_GLETSCHER01	2017-09-07	1006.58	1021.51	-14.93
KJER_GLETSCHER01	2017-09-08	1011.23	1026.19	-14.96
KJER_GLETSCHER01	2017-09-26	1014.23	1029.27	-15.04
KJER_GLETSCHER01	2017-09-27	1016.98	1032.14	-15.16
KJER_GLETSCHER01	2017-10-01	1011.01	1024.06	-13.05
KJER_GLETSCHER01	2019-04-11	1004.5	1019.31	-14.81
KJER_GLETSCHER01	2020-01-08	988.57	1017.78	-29.22
KJER_GLETSCHER01	2020-04-08	988.88	1017.27	-28.39
KJER_GLETSCHER01	2020-07-08	988.45	1016.3	-27.84
KJER_GLETSCHER01	2020-10-07	993.19	1015.85	-22.66
KJER_GLETSCHER02	2012-03-03	1194.86	1202.83	-7.97
KJER_GLETSCHER02	2012-04-06	1203.96	1212.13	-8.17
KJER_GLETSCHER02	2012-04-20	1190.33	1198.3	-7.97
KJER_GLETSCHER02	2012-04-23	1197.51	1205.55	-8.04
KJER_GLETSCHER02	2012-04-27	1193.92	1201.88	-7.96
KJER_GLETSCHER02	2012-07-13	1195.92	1203.74	-7.81
KJER_GLETSCHER02	2013-05-09	1195.5	1200.99	-5.48
KJER_GLETSCHER02	2014-03-09	1195.9	1201.87	-5.97
KJER_GLETSCHER02	2014-06-04	1192.86	1200.85	-7.99
KJER_GLETSCHER02	2015-04-17	1194.96	1203.04	-8.08
KJER_GLETSCHER02	2015-04-24	1195.78	1201.01	-5.23
KJER_GLETSCHER02	2015-05-03	1187.85	1197.16	-9.31
KJER_GLETSCHER02	2015-05-11	1193.32	1201.35	-8.03
KJER_GLETSCHER02	2015-05-18	1189.54	1198.31	-8.77
KJER_GLETSCHER02	2015-05-29	1189.53	1201.81	-12.28
KJER_GLETSCHER02	2015-06-03	1184.29	1192.34	-8.06
KJER_GLETSCHER02	2015-06-05	1190.17	1201.88	-11.71
KJER_GLETSCHER02	2015-06-08	1189.62	1197.78	-8.15
KJER_GLETSCHER02	2015-06-11	1187.11	1195.27	-8.16
KJER_GLETSCHER02	2015-06-12	1195.18	1203.33	-8.15
KJER_GLETSCHER02	2015-06-13	1193.08	1201.17	-8.1
KJER_GLETSCHER02	2015-06-15	1187.1	1197.14	-10.04
KJER_GLETSCHER02	2015-06-19	1191.14	1200.1	-8.96
KJER_GLETSCHER02	2015-06-22	1195.2	1203.38	-8.18
KJER_GLETSCHER02	2015-06-30	1170.25	1170.04	0.22
KJER_GLETSCHER02	2015-07-05	1192.39	1200.53	-8.14
KJER_GLETSCHER02	2015-07-08	1192	1200.16	-8.16
KJER_GLETSCHER02	2015-07-11	1192.13	1200.18	-8.05
KJER_GLETSCHER02	2015-07-16	1190.83	1198.71	-7.88
KJER_GLETSCHER02	2015-07-17	1200.55	1208.33	-7.78
KJER_GLETSCHER02	2015-07-18	1191.97	1199.81	-7.84
KJER_GLETSCHER02	2015-07-24	1188.82	1199.15	-10.33
KJER_GLETSCHER02	2015-07-27	1196.31	1203.42	-7.11
KJER_GLETSCHER02	2015-07-28	1190.78	1198.41	-7.64
KJER_GLETSCHER02	2015-07-29	1196.2	1203.73	-7.54
KJER_GLETSCHER02	2015-07-30	1198.03	1203.45	-5.42
KJER_GLETSCHER02	2015-07-31	1195.57	1203.16	-7.58
KJER_GLETSCHER02	2015-08-01	1186.61	1198.06	-11.45
KJER_GLETSCHER02	2016-03-26	1192.26	1199.57	-7.31
KJER_GLETSCHER02	2016-06-02	1189.13	1197.34	-8.21
KJER_GLETSCHER02	2017-05-09	1191.74	1200.14	-8.4
KJER_GLETSCHER02	2017-09-07	1203.21	1203.14	0.07
KJER_GLETSCHER02	2019-05-01	1184.66	1206.9	-22.25
KJER_GLETSCHER02	2019-07-31	1183.86	1204.13	-20.27
KJER_GLETSCHER02	2020-01-29	1185.1	1204.01	-18.9
KJER_GLETSCHER02	2020-04-29	1175.57	1205.47	-29.91
KJER_GLETSCHER02	2020-07-29	1174.83	1206.13	-31.3
KJER_GLETSCHER02	2020-10-27	1174.78	1204.06	-29.27
KJER_GLETSCHER03	2012-04-06	1240.26	1246.78	-6.52
KJER_GLETSCHER03	2012-04-20	1226.7	1233.22	-6.52
KJER_GLETSCHER03	2012-04-23	1234.08	1240.64	-6.56
KJER_GLETSCHER03	2012-04-27	1230.54	1237.05	-6.5
KJER_GLETSCHER03	2012-07-13	1233.04	1239.01	-5.98
KJER_GLETSCHER03	2013-05-09	1232.81	1237.49	-4.68
KJER_GLETSCHER03	2014-03-09	1231.97	1236.4	-4.42
KJER_GLETSCHER03	2014-06-04	1229.87	1235.76	-5.89
KJER_GLETSCHER03	2015-04-17	1232.66	1238	-5.34
KJER_GLETSCHER03	2015-04-24	1230.61	1235.98	-5.37
KJER_GLETSCHER03	2015-05-03	1228.47	1234.43	-5.96
KJER_GLETSCHER03	2015-05-11	1230.75	1236.17	-5.42
KJER_GLETSCHER03	2015-05-18	1229.69	1235.17	-5.48
KJER_GLETSCHER03	2015-05-29	1231.82	1239.05	-7.23
KJER_GLETSCHER03	2015-06-03	1222.48	1227.76	-5.28
KJER_GLETSCHER03	2015-06-05	1232.15	1238.95	-6.8
KJER_GLETSCHER03	2015-06-08	1227.07	1232.59	-5.52
KJER_GLETSCHER03	2015-06-11	1224.66	1230.17	-5.51
KJER_GLETSCHER03	2015-06-12	1232.63	1238.1	-5.47
KJER_GLETSCHER03	2015-06-13	1230.35	1235.83	-5.48
KJER_GLETSCHER03	2015-06-15	1228.66	1234.77	-6.11
KJER_GLETSCHER03	2015-06-19	1231.48	1237	-5.52
KJER_GLETSCHER03	2015-06-22	1232.98	1238.48	-5.5
KJER_GLETSCHER03	2015-07-05	1229.82	1235.35	-5.53
KJER_GLETSCHER03	2015-07-08	1229.48	1234.97	-5.49
KJER_GLETSCHER03	2015-07-11	1229.56	1234.93	-5.37
KJER_GLETSCHER03	2015-07-16	1228.69	1233.61	-4.92
KJER_GLETSCHER03	2015-07-17	1238.42	1243.2	-4.79
KJER_GLETSCHER03	2015-07-18	1230.19	1234.89	-4.71
KJER_GLETSCHER03	2015-07-24	1231.19	1236.39	-5.2
KJER_GLETSCHER03	2015-07-27	1235.27	1239.26	-3.99
KJER_GLETSCHER03	2015-07-28	1229.9	1234.01	-4.11
KJER_GLETSCHER03	2015-07-29	1234.59	1238.78	-4.19
KJER_GLETSCHER03	2015-07-30	1239.92	1243.18	-3.26
KJER_GLETSCHER03	2015-07-31	1234.59	1238.71	-4.12
KJER_GLETSCHER03	2015-08-01	1229.45	1235.14	-5.7
KJER_GLETSCHER03	2016-03-26	1231	1235.46	-4.46
KJER_GLETSCHER03	2016-06-02	1227.5	1232.19	-4.69
KJER_GLETSCHER03	2017-05-09	1231.06	1235.49	-4.43
KJER_GLETSCHER03	2017-05-12	1231.06	1235.86	-4.8
KJER_GLETSCHER03	2017-06-15	1232.29	1237.17	-4.89
KJER_GLETSCHER03	2017-08-18	1229.29	1234.46	-5.17
KJER_GLETSCHER03	2017-08-26	1228.02	1233.29	-5.27
KJER_GLETSCHER03	2017-09-07	1227.39	1232.64	-5.25
KJER_GLETSCHER03	2017-09-08	1231.18	1236.42	-5.24
KJER_GLETSCHER03	2019-09-07	1226.52	1236.59	-10.08
KJER_GLETSCHER03	2019-12-06	1221.02	1233.97	-12.95
KJER_GLETSCHER03	2020-03-06	1221.76	1237.77	-16.01
KJER_GLETSCHER03	2020-06-05	1221.62	1237.87	-16.26
KJER_GLETSCHER03	2020-09-04	1221.57	1236.11	-14.54
KJER_GLETSCHER03	2020-12-04	1222.38	1236.26	-13.88
KONG_OSCAR_GLETSCHER01	2012-04-11	1036.71	1048.15	-11.44
KONG_OSCAR_GLETSCHER01	2013-04-02	1052.99	1059.71	-6.72
KONG_OSCAR_GLETSCHER01	2014-08-23	1035.65	1048.08	-12.43
KONG_OSCAR_GLETSCHER01	2014-09-04	1040.37	1053.17	-12.8
KONG_OSCAR_GLETSCHER01	2014-09-16	1042.38	1055.09	-12.71
KONG_OSCAR_GLETSCHER01	2014-10-01	1045.19	1058.06	-12.87
KONG_OSCAR_GLETSCHER01	2015-03-06	1040.45	1054.21	-13.76
KONG_OSCAR_GLETSCHER01	2016-05-08	1039.65	1052.76	-13.11
KONG_OSCAR_GLETSCHER01	2016-05-15	1036.86	1050.25	-13.39
KONG_OSCAR_GLETSCHER01	2017-04-24	1036.14	1051.05	-14.91
KONG_OSCAR_GLETSCHER01	2019-04-19	1034.99	1054.59	-19.6
KONG_OSCAR_GLETSCHER01	2019-10-18	1036.05	1059	-22.94
KONG_OSCAR_GLETSCHER01	2020-01-16	1036.04	1054.69	-18.64
KONG_OSCAR_GLETSCHER01	2020-04-16	1034.89	1049.94	-15.04
KONG_OSCAR_GLETSCHER01	2020-10-15	1033.77	1048.9	-15.14
KONG_OSCAR_GLETSCHER02	2012-04-11	1041.83	1048.52	-6.69
KONG_OSCAR_GLETSCHER02	2012-07-04	1047.68	1061.57	-13.89
KONG_OSCAR_GLETSCHER02	2013-04-02	1050.47	1063.83	-13.36
KONG_OSCAR_GLETSCHER02	2014-08-23	1033.28	1055.59	-22.31
KONG_OSCAR_GLETSCHER02	2014-09-04	1045.91	1059.55	-13.64
KONG_OSCAR_GLETSCHER02	2014-09-16	1047.79	1061.47	-13.68
KONG_OSCAR_GLETSCHER02	2014-10-01	1050.61	1064.45	-13.84
KONG_OSCAR_GLETSCHER02	2015-03-06	1046.39	1060.55	-14.15
KONG_OSCAR_GLETSCHER02	2015-04-24	1052.33	1058.31	-5.98
KONG_OSCAR_GLETSCHER02	2016-05-08	1043.86	1058.44	-14.58
KONG_OSCAR_GLETSCHER02	2016-05-15	1041.18	1055.95	-14.77
KONG_OSCAR_GLETSCHER02	2017-04-24	1042.61	1057.54	-14.93
KONG_OSCAR_GLETSCHER02	2019-10-18	1044.66	1079.14	-34.47
KONG_OSCAR_GLETSCHER02	2020-01-16	1051.28	1073.28	-22
KONG_OSCAR_GLETSCHER02	2020-04-16	1051.75	1073.8	-22.05
KONG_OSCAR_GLETSCHER02	2020-10-15	1051.5	1054.15	-2.65
NANSEN_GLETSCHER01	2012-04-10	1099.36	1122.45	-23.1
NANSEN_GLETSCHER01	2012-07-04	1100.8	1106.2	-5.4
NANSEN_GLETSCHER01	2012-07-16	1098.43	1107.04	-8.6
NANSEN_GLETSCHER01	2012-07-17	1098.2	1106.72	-8.52
NANSEN_GLETSCHER01	2013-05-20	1112.73	1121.06	-8.33
NANSEN_GLETSCHER01	2013-05-28	1096.46	1101.56	-5.1
NANSEN_GLETSCHER01	2013-05-30	1103.92	1111.91	-7.99
NANSEN_GLETSCHER01	2014-08-23	1095.95	1104.28	-8.33
NANSEN_GLETSCHER01	2014-09-29	1104.95	1113.36	-8.4
NANSEN_GLETSCHER01	2015-03-09	1101.89	1110.66	-8.77
NANSEN_GLETSCHER01	2015-04-10	1101.96	1109.82	-7.86
NANSEN_GLETSCHER01	2016-05-08	1099.92	1106.01	-6.08
NANSEN_GLETSCHER01	2017-04-12	1103.68	1112.29	-8.6
NANSEN_GLETSCHER01	2017-06-19	1098.24	1106.97	-8.72
NANSEN_GLETSCHER01	2019-06-16	1096.03	1113.57	-17.54
NANSEN_GLETSCHER01	2019-09-15	1096.33	1108.08	-11.75
NANSEN_GLETSCHER01	2020-03-14	1096.52	1121.88	-25.36
NANSEN_GLETSCHER01	2020-06-13	1096.41	1121.78	-25.37
NANSEN_GLETSCHER01	2020-09-12	1095.74	1121.05	-25.31
NANSEN_GLETSCHER01	2020-12-12	1095.98	1121.03	-25.04
NORDENSKIOLD_GLETSCHER01	2012-07-18	1170.54	1185.65	-15.12
NORDENSKIOLD_GLETSCHER01	2012-09-07	1166	1181.51	-15.52
NORDENSKIOLD_GLETSCHER01	2013-05-28	1173.36	1188.21	-14.85
NORDENSKIOLD_GLETSCHER01	2015-06-17	1174.95	1194.77	-19.83
NORDENSKIOLD_GLETSCHER01	2015-07-16	1174.26	1184	-9.74
NORDENSKIOLD_GLETSCHER01	2016-02-16	1177.08	1188.67	-11.59
NORDENSKIOLD_GLETSCHER01	2016-03-29	1178.18	1190.67	-12.49
NORDENSKIOLD_GLETSCHER01	2016-04-06	1175.28	1186.97	-11.7
NORDENSKIOLD_GLETSCHER01	2017-04-29	1167.93	1182.72	-14.79
NORDENSKIOLD_GLETSCHER01	2017-07-13	1178.21	1190.85	-12.64
NORDENSKIOLD_GLETSCHER01	2017-09-05	1176.02	1186.11	-10.09
NORDENSKIOLD_GLETSCHER01	2019-05-19	1176.08	1181.95	-5.87
NORDENSKIOLD_GLETSCHER01	2019-08-18	1172.1	1178.89	-6.79
NORDENSKIOLD_GLETSCHER01	2019-11-16	1171.97	1179.9	-7.93
NORDENSKIOLD_GLETSCHER01	2020-02-15	1172.45	1180.36	-7.9
NORDENSKIOLD_GLETSCHER01	2020-05-16	1172.71	1180.64	-7.93
NORDENSKIOLD_GLETSCHER01	2020-08-15	1174.78	1179.87	-5.09
NORDENSKIOLD_GLETSCHER01	2020-11-14	1174.09	1179.98	-5.9
NORDENSKIOLD_GLETSCHER02	2010-06-17	1482.34	1491.87	-9.52
NORDENSKIOLD_GLETSCHER02	2011-09-19	1478.18	1484.96	-6.77
NORDENSKIOLD_GLETSCHER02	2013-02-20	1480.74	1488.69	-7.95
NORDENSKIOLD_GLETSCHER02	2013-05-13	1469.4	1477.3	-7.9
NORDENSKIOLD_GLETSCHER02	2014-06-21	1474.83	1482.94	-8.11
NORDENSKIOLD_GLETSCHER02	2015-05-26	1476.75	1482.62	-5.86
NORDENSKIOLD_GLETSCHER02	2015-06-03	1479.56	1485.49	-5.93
NORDENSKIOLD_GLETSCHER02	2015-10-24	1475.66	1482.86	-7.2
NORDENSKIOLD_GLETSCHER02	2016-02-06	1477.43	1484.58	-7.15
NORDENSKIOLD_GLETSCHER02	2016-03-15	1476.45	1483.54	-7.09
NORDENSKIOLD_GLETSCHER02	2017-09-09	1475.93	1480.68	-4.76
NORDENSKIOLD_GLETSCHER02	2019-06-05	1479.04	1483.12	-4.07
NORDENSKIOLD_GLETSCHER02	2019-12-04	1474.87	1482.11	-7.24
NORDENSKIOLD_GLETSCHER02	2020-03-04	1475.03	1482.24	-7.22
PETERMANN_GLETSCHER01	2013-04-06	1193.63	1202.57	-8.94
PETERMANN_GLETSCHER01	2013-04-10	1191.48	1200.1	-8.62
PETERMANN_GLETSCHER01	2013-04-21	1189.42	1197.64	-8.22
PETERMANN_GLETSCHER01	2013-09-20	1187.55	1197.74	-10.19
PETERMANN_GLETSCHER01	2014-05-01	1186.14	1195.24	-9.09
PETERMANN_GLETSCHER01	2014-08-14	1185.95	1195.8	-9.86
PETERMANN_GLETSCHER01	2015-03-14	1185.53	1193.62	-8.09
PETERMANN_GLETSCHER01	2015-03-27	1189.62	1200.35	-10.72
PETERMANN_GLETSCHER01	2016-04-06	1190.39	1197.89	-7.5
PETERMANN_GLETSCHER01	2016-04-07	1190.24	1197.38	-7.15
PETERMANN_GLETSCHER01	2016-05-21	1188.46	1195.65	-7.18
PETERMANN_GLETSCHER01	2016-05-24	1188.22	1195.41	-7.19
PETERMANN_GLETSCHER01	2016-05-25	1189.22	1196.44	-7.22
PETERMANN_GLETSCHER01	2016-05-29	1189.22	1196.67	-7.45
PETERMANN_GLETSCHER01	2016-05-30	1186.47	1193.74	-7.27
PETERMANN_GLETSCHER01	2016-06-02	1186.27	1193.56	-7.29
PETERMANN_GLETSCHER01	2016-06-12	1200.03	1210.3	-10.27
PETERMANN_GLETSCHER01	2016-06-18	1188.84	1196.97	-8.13
PETERMANN_GLETSCHER01	2016-07-12	1185.31	1192.62	-7.31
PETERMANN_GLETSCHER01	2016-07-17	1190.33	1197.58	-7.24
PETERMANN_GLETSCHER01	2016-07-23	1189.05	1196.08	-7.03
PETERMANN_GLETSCHER01	2016-08-09	1188.45	1195.11	-6.65
PETERMANN_GLETSCHER01	2016-08-16	1190.99	1197.63	-6.63
PETERMANN_GLETSCHER01	2016-08-31	1197.51	1204.26	-6.75
PETERMANN_GLETSCHER01	2016-09-03	1195.26	1201.95	-6.69
PETERMANN_GLETSCHER01	2016-09-13	1195.51	1202.32	-6.81
PETERMANN_GLETSCHER01	2017-03-06	1194.37	1202	-7.63
PETERMANN_GLETSCHER01	2017-03-18	1191.99	1199.15	-7.15
PETERMANN_GLETSCHER01	2017-04-24	1190.63	1198.16	-7.53
PETERMANN_GLETSCHER01	2017-05-01	1192.85	1200.22	-7.37
PETERMANN_GLETSCHER01	2017-05-13	1191.94	1199.32	-7.38
PETERMANN_GLETSCHER01	2017-05-16	1189.56	1197.01	-7.46
PETERMANN_GLETSCHER01	2017-05-20	1190.25	1197.61	-7.37
PETERMANN_GLETSCHER01	2017-05-27	1181.52	1188.93	-7.4
PETERMANN_GLETSCHER01	2017-06-07	1192.95	1200.34	-7.4
PETERMANN_GLETSCHER01	2017-06-10	1190.5	1197.95	-7.45
PETERMANN_GLETSCHER01	2017-06-12	1189.28	1197.83	-8.55
PETERMANN_GLETSCHER01	2017-06-17	1191.08	1198.64	-7.56
PETERMANN_GLETSCHER01	2017-06-29	1187.98	1195.53	-7.55
PETERMANN_GLETSCHER01	2017-07-02	1188.02	1195.63	-7.62
PETERMANN_GLETSCHER01	2017-07-08	1186.61	1194.17	-7.56
PETERMANN_GLETSCHER01	2017-07-20	1187.93	1195.47	-7.53
PETERMANN_GLETSCHER01	2017-07-22	1185.52	1193.74	-8.22
PETERMANN_GLETSCHER01	2017-08-16	1190.59	1198.18	-7.59
PETERMANN_GLETSCHER01	2017-08-19	1188.4	1196.68	-8.28
PETERMANN_GLETSCHER01	2017-08-22	1184.69	1192.34	-7.65
PETERMANN_GLETSCHER01	2017-09-07	1190.61	1198.51	-7.9
PETERMANN_GLETSCHER01	2017-09-11	1191.75	1199.5	-7.75
PETERMANN_GLETSCHER01	2019-03-30	1187.52	1199.22	-11.69
PETERMANN_GLETSCHER01	2019-12-27	1187.4	1200.62	-13.22
PETERMANN_GLETSCHER01	2020-03-27	1188.87	1199.19	-10.32
PETERMANN_GLETSCHER01	2020-06-26	1188.82	1199.7	-10.87
PETERMANN_GLETSCHER02	2012-05-13	925.57	926.47	-0.9
PETERMANN_GLETSCHER02	2013-04-01	922.67	923.79	-1.12
PETERMANN_GLETSCHER02	2013-09-22	920.66	921.25	-0.59
PETERMANN_GLETSCHER02	2013-09-28	932.99	933.61	-0.62
PETERMANN_GLETSCHER02	2014-05-02	930.09	930.7	-0.61
PETERMANN_GLETSCHER02	2014-05-17	930.43	931.04	-0.61
PETERMANN_GLETSCHER02	2015-03-20	928.3	929	-0.7
PETERMANN_GLETSCHER02	2015-06-22	926.7	927	-0.3
PETERMANN_GLETSCHER02	2016-03-30	938.05	938.76	-0.71
PETERMANN_GLETSCHER02	2016-05-19	924.74	925.88	-1.14
PETERMANN_GLETSCHER02	2016-05-21	925.78	926.51	-0.73
PETERMANN_GLETSCHER02	2016-05-24	921.71	922.45	-0.74
PETERMANN_GLETSCHER02	2016-06-02	930.92	931.64	-0.72
PETERMANN_GLETSCHER02	2016-07-09	931.3	931.82	-0.52
PETERMANN_GLETSCHER02	2016-07-10	930.38	930.8	-0.42
PETERMANN_GLETSCHER02	2016-07-12	928.84	929.33	-0.49
PETERMANN_GLETSCHER02	2016-07-14	923.75	924.99	-1.24
PETERMANN_GLETSCHER02	2016-07-19	926.51	927.19	-0.68
PETERMANN_GLETSCHER02	2016-07-21	928.49	928.99	-0.51
PETERMANN_GLETSCHER02	2016-07-29	923.84	925.15	-1.32
PETERMANN_GLETSCHER02	2016-08-07	925.26	925.96	-0.7
PETERMANN_GLETSCHER02	2016-08-10	924.29	925.05	-0.76
PETERMANN_GLETSCHER02	2016-08-31	925.26	925.96	-0.7
PETERMANN_GLETSCHER02	2016-09-19	926.85	927.57	-0.72
PETERMANN_GLETSCHER02	2016-10-04	931.18	931.89	-0.7
PETERMANN_GLETSCHER02	2017-03-21	924.36	925.17	-0.81
PETERMANN_GLETSCHER02	2017-04-26	926.7	927.4	-0.7
PETERMANN_GLETSCHER02	2017-04-29	925.81	926.49	-0.67
PETERMANN_GLETSCHER02	2017-04-30	927.73	928.42	-0.69
PETERMANN_GLETSCHER02	2017-05-13	925.73	926.42	-0.69
PETERMANN_GLETSCHER02	2017-05-14	929.7	930.03	-0.34
PETERMANN_GLETSCHER02	2017-05-15	926.69	927.89	-1.2
PETERMANN_GLETSCHER02	2017-05-16	927.08	928.09	-1.01
PETERMANN_GLETSCHER02	2017-05-19	921.08	922.26	-1.18
PETERMANN_GLETSCHER02	2017-05-28	927.79	928.34	-0.55
PETERMANN_GLETSCHER02	2017-05-31	926.6	927.31	-0.71
PETERMANN_GLETSCHER02	2017-06-25	927.77	928.46	-0.69
PETERMANN_GLETSCHER02	2017-06-30	926.61	927.43	-0.83
PETERMANN_GLETSCHER02	2017-07-01	927.7	928.41	-0.7
PETERMANN_GLETSCHER02	2017-07-11	926.96	927.68	-0.72
PETERMANN_GLETSCHER02	2017-07-12	933.53	934.17	-0.64
PETERMANN_GLETSCHER02	2017-07-15	927.59	928.3	-0.71
PETERMANN_GLETSCHER02	2017-07-29	929.14	929.82	-0.68
PETERMANN_GLETSCHER02	2017-08-16	929.07	929.49	-0.42
PETERMANN_GLETSCHER02	2017-08-17	929.31	929.67	-0.36
PETERMANN_GLETSCHER02	2017-08-20	927.31	927.69	-0.37
PETERMANN_GLETSCHER02	2017-08-21	928.66	928.92	-0.27
PETERMANN_GLETSCHER02	2017-08-31	933.24	932.87	0.37
PETERMANN_GLETSCHER02	2017-09-02	931.16	931.51	-0.35
PETERMANN_GLETSCHER02	2017-09-07	927.86	928.33	-0.47
PETERMANN_GLETSCHER02	2017-09-10	939.62	940.01	-0.39
PETERMANN_GLETSCHER02	2019-04-05	931	930.09	0.91
PETERMANN_GLETSCHER02	2019-10-04	923.36	928.76	-5.4
PETERMANN_GLETSCHER02	2020-01-03	923.97	928.77	-4.8
PETERMANN_GLETSCHER02	2020-04-03	925.26	929.08	-3.81
PETERMANN_GLETSCHER02	2020-10-01	927.96	928.14	-0.18
RYDER_GLETSCHER01	2013-04-06	1145.54	1153.67	-8.13
RYDER_GLETSCHER01	2013-09-09	1141.98	1150.42	-8.44
RYDER_GLETSCHER01	2013-09-19	1146.99	1154.91	-7.93
RYDER_GLETSCHER01	2014-03-30	1138.82	1146.99	-8.17
RYDER_GLETSCHER01	2014-04-01	1138.98	1146.77	-7.79
RYDER_GLETSCHER01	2015-05-10	1135.82	1144.85	-9.04
RYDER_GLETSCHER01	2015-05-17	1140.98	1150.02	-9.05
RYDER_GLETSCHER01	2016-05-05	1144.18	1149.83	-5.64
RYDER_GLETSCHER01	2016-05-09	1140.44	1148.82	-8.38
RYDER_GLETSCHER01	2016-05-15	1135.9	1144.17	-8.28
RYDER_GLETSCHER01	2016-05-21	1142.77	1151.21	-8.44
RYDER_GLETSCHER01	2016-05-25	1139.35	1147.74	-8.39
RYDER_GLETSCHER01	2016-05-28	1143.51	1151.42	-7.91
RYDER_GLETSCHER01	2016-06-03	1138.48	1151.83	-13.35
RYDER_GLETSCHER01	2016-06-11	1142.18	1150.73	-8.55
RYDER_GLETSCHER01	2016-06-14	1141.77	1150.33	-8.56
RYDER_GLETSCHER01	2016-06-17	1142.58	1151.1	-8.52
RYDER_GLETSCHER01	2016-06-29	1137.72	1146.18	-8.47
RYDER_GLETSCHER01	2016-07-09	1149.96	1158.46	-8.5
RYDER_GLETSCHER01	2016-07-13	1143.06	1151.55	-8.49
RYDER_GLETSCHER01	2016-07-19	1139.36	1147.71	-8.36
RYDER_GLETSCHER01	2016-07-21	1148.81	1157.79	-8.98
RYDER_GLETSCHER01	2016-07-28	1139.92	1148.62	-8.71
RYDER_GLETSCHER01	2016-07-29	1142.12	1150.62	-8.5
RYDER_GLETSCHER01	2016-07-31	1140.89	1149.35	-8.46
RYDER_GLETSCHER01	2016-08-16	1139.36	1151.79	-12.43
RYDER_GLETSCHER01	2016-09-07	1143.83	1152.32	-8.48
RYDER_GLETSCHER01	2016-09-08	1140.05	1148.65	-8.61
RYDER_GLETSCHER01	2016-09-10	1142.12	1150.63	-8.51
RYDER_GLETSCHER01	2016-09-11	1142.81	1151.35	-8.54
RYDER_GLETSCHER01	2016-09-13	1140.74	1149.25	-8.5
RYDER_GLETSCHER01	2016-09-14	1138.43	1147.05	-8.62
RYDER_GLETSCHER01	2016-09-16	1136.31	1144.57	-8.26
RYDER_GLETSCHER01	2016-09-25	1144.72	1150.61	-5.89
RYDER_GLETSCHER01	2017-03-26	1139.22	1144.01	-4.79
RYDER_GLETSCHER01	2017-04-18	1136.44	1145.95	-9.52
RYDER_GLETSCHER01	2017-04-30	1142.51	1150.89	-8.38
RYDER_GLETSCHER01	2017-05-01	1140.45	1148.93	-8.48
RYDER_GLETSCHER01	2017-05-20	1138.25	1146.73	-8.47
RYDER_GLETSCHER01	2017-05-27	1139.44	1148.19	-8.75
RYDER_GLETSCHER01	2017-06-07	1142.36	1150.81	-8.45
RYDER_GLETSCHER01	2017-06-10	1140.6	1148.57	-7.97
RYDER_GLETSCHER01	2017-07-01	1140.77	1149.11	-8.34
RYDER_GLETSCHER01	2017-07-02	1139.91	1148.28	-8.37
RYDER_GLETSCHER01	2017-07-07	1138.62	1147.24	-8.62
RYDER_GLETSCHER01	2017-07-16	1139.19	1150.73	-11.55
RYDER_GLETSCHER01	2017-07-18	1137.66	1146.22	-8.56
RYDER_GLETSCHER01	2017-07-26	1137.77	1146.2	-8.43
RYDER_GLETSCHER01	2017-07-29	1141.12	1149.67	-8.54
RYDER_GLETSCHER01	2017-07-30	1140.78	1149.26	-8.48
RYDER_GLETSCHER01	2017-08-06	1142.8	1151.09	-8.29
RYDER_GLETSCHER01	2017-08-17	1143.13	1151.62	-8.48
RYDER_GLETSCHER01	2017-08-18	1137.76	1146.08	-8.32
RYDER_GLETSCHER01	2017-08-23	1139.37	1147.68	-8.31
RYDER_GLETSCHER01	2017-09-08	1141.23	1149.48	-8.25
RYDER_GLETSCHER01	2019-04-27	1141.1	1156.06	-14.96
RYDER_GLETSCHER01	2019-07-27	1140.26	1156.16	-15.91
RYDER_GLETSCHER01	2019-10-26	1140.86	1155.32	-14.46
RYDER_GLETSCHER01	2020-01-25	1141.72	1155.56	-13.84
RYDER_GLETSCHER01	2020-04-25	1141.64	1155.25	-13.62
RYDER_GLETSCHER01	2020-07-25	1141.71	1154.34	-12.62
RYDER_GLETSCHER01	2020-10-23	1142.11	1154.14	-12.03
RYDER_GLETSCHER02	2012-05-10	898.54	941.44	-42.91
RYDER_GLETSCHER02	2013-04-06	891.12	926.47	-35.34
RYDER_GLETSCHER02	2013-04-15	890.86	925.81	-34.95
RYDER_GLETSCHER02	2013-06-28	886.15	920.08	-33.93
RYDER_GLETSCHER02	2013-09-19	902.07	928.62	-26.55
RYDER_GLETSCHER02	2014-03-30	891.76	921.49	-29.74
RYDER_GLETSCHER02	2015-04-28	880.16	908.69	-28.53
RYDER_GLETSCHER02	2015-04-29	891.54	926.59	-35.05
RYDER_GLETSCHER02	2015-05-01	884.28	919.77	-35.5
RYDER_GLETSCHER02	2015-05-03	886.31	912.73	-26.43
RYDER_GLETSCHER02	2015-05-05	886.31	912.2	-25.9
RYDER_GLETSCHER02	2015-05-09	886.87	915.37	-28.5
RYDER_GLETSCHER02	2015-05-17	888.78	959.26	-70.47
RYDER_GLETSCHER02	2016-05-05	888.7	923.87	-35.17
RYDER_GLETSCHER02	2016-05-06	893.15	914.32	-21.17
RYDER_GLETSCHER02	2016-05-13	888.96	921.46	-32.51
RYDER_GLETSCHER02	2016-05-20	887.22	916.12	-28.9
RYDER_GLETSCHER02	2016-05-25	887.04	922.04	-34.99
RYDER_GLETSCHER02	2016-05-27	890.53	919.13	-28.6
RYDER_GLETSCHER02	2016-05-28	891.4	928.15	-36.75
RYDER_GLETSCHER02	2016-05-29	885.37	917.15	-31.79
RYDER_GLETSCHER02	2016-06-02	892.99	933.34	-40.35
RYDER_GLETSCHER02	2016-06-03	888.96	922.96	-34
RYDER_GLETSCHER02	2016-06-07	889.92	913.93	-24
RYDER_GLETSCHER02	2016-06-11	890.47	924.31	-33.84
RYDER_GLETSCHER02	2016-06-12	893.75	917.58	-23.83
RYDER_GLETSCHER02	2016-06-14	889.06	931.36	-42.3
RYDER_GLETSCHER02	2016-06-18	890.42	926.13	-35.71
RYDER_GLETSCHER02	2016-06-25	886.61	912.68	-26.07
RYDER_GLETSCHER02	2016-06-28	891.28	920.15	-28.87
RYDER_GLETSCHER02	2016-06-29	886.23	922.31	-36.08
RYDER_GLETSCHER02	2016-07-09	898.91	919.74	-20.84
RYDER_GLETSCHER02	2016-07-11	886.52	917.89	-31.37
RYDER_GLETSCHER02	2016-07-12	898.44	920.42	-21.97
RYDER_GLETSCHER02	2016-07-14	894.61	916.78	-22.17
RYDER_GLETSCHER02	2016-07-15	891.29	918.78	-27.49
RYDER_GLETSCHER02	2016-07-19	895.57	914.33	-18.76
RYDER_GLETSCHER02	2016-07-21	874.2	931.03	-56.82
RYDER_GLETSCHER02	2016-07-29	890.09	927.12	-37.03
RYDER_GLETSCHER02	2016-07-31	888.73	925.2	-36.47
RYDER_GLETSCHER02	2016-08-01	886.98	912.63	-25.65
RYDER_GLETSCHER02	2016-08-23	893.25	915.4	-22.15
RYDER_GLETSCHER02	2016-09-03	886.14	915.34	-29.19
RYDER_GLETSCHER02	2016-09-04	888.11	921.69	-33.58
RYDER_GLETSCHER02	2016-09-08	887.53	922.37	-34.84
RYDER_GLETSCHER02	2016-09-09	890.01	914.9	-24.9
RYDER_GLETSCHER02	2016-09-11	889.61	924.25	-34.65
RYDER_GLETSCHER02	2016-09-13	888.38	923.21	-34.83
RYDER_GLETSCHER02	2016-09-14	892.05	923.25	-31.2
RYDER_GLETSCHER02	2016-09-15	886.84	910.89	-24.05
RYDER_GLETSCHER02	2016-09-19	892.31	927.27	-34.96
RYDER_GLETSCHER02	2016-09-25	892.08	927.33	-35.25
RYDER_GLETSCHER02	2017-03-26	886.6	921.28	-34.68
RYDER_GLETSCHER02	2017-04-20	896.96	922.95	-25.99
RYDER_GLETSCHER02	2017-04-25	889.5	915.65	-26.15
RYDER_GLETSCHER02	2017-04-29	890.51	924.82	-34.31
RYDER_GLETSCHER02	2017-04-30	890.07	929.24	-39.17
RYDER_GLETSCHER02	2017-05-06	890.61	914.85	-24.25
RYDER_GLETSCHER02	2017-05-09	886.51	920.31	-33.79
RYDER_GLETSCHER02	2017-05-10	891.24	928.03	-36.79
RYDER_GLETSCHER02	2017-05-18	888.03	916.35	-28.32
RYDER_GLETSCHER02	2017-05-22	885.28	912.2	-26.92
RYDER_GLETSCHER02	2017-05-30	898.52	921.02	-22.49
RYDER_GLETSCHER02	2017-05-31	889.81	921.35	-31.54
RYDER_GLETSCHER02	2017-06-07	890.92	925.26	-34.34
RYDER_GLETSCHER02	2017-06-08	888.4	920.63	-32.23
RYDER_GLETSCHER02	2017-06-10	890.89	917.5	-26.61
RYDER_GLETSCHER02	2017-06-25	887.96	912.23	-24.27
RYDER_GLETSCHER02	2017-07-02	888.25	923.51	-35.26
RYDER_GLETSCHER02	2017-07-07	886.91	921.98	-35.08
RYDER_GLETSCHER02	2017-07-08	890.44	922.33	-31.89
RYDER_GLETSCHER02	2017-07-15	891.54	918.47	-26.94
RYDER_GLETSCHER02	2017-07-17	889.39	914.54	-25.15
RYDER_GLETSCHER02	2017-07-25	886.82	923.17	-36.35
RYDER_GLETSCHER02	2017-07-26	883.34	905.53	-22.19
RYDER_GLETSCHER02	2017-07-29	890.16	924.02	-33.86
RYDER_GLETSCHER02	2017-08-05	894.64	923.73	-29.09
RYDER_GLETSCHER02	2017-08-06	853.42	922.1	-68.68
RYDER_GLETSCHER02	2017-08-15	896.67	907.94	-11.27
RYDER_GLETSCHER02	2017-08-18	892.64	925.56	-32.91
RYDER_GLETSCHER02	2017-08-23	894.67	923.67	-29
RYDER_GLETSCHER02	2017-09-08	895.73	923.99	-28.27
RYDER_GLETSCHER02	2017-09-11	896.77	915.83	-19.05
RYDER_GLETSCHER02	2017-09-26	1113.03	980.69	132.34
RYDER_GLETSCHER02	2019-05-08	892.61	926.68	-34.08
RYDER_GLETSCHER02	2019-11-05	891.7	924.02	-32.32
RYDER_GLETSCHER02	2020-02-04	873.12	929.82	-56.7
RYDER_GLETSCHER02	2020-05-05	881.21	925.96	-44.75
RYDER_GLETSCHER02	2020-08-04	877.87	927.31	-49.44
RYDER_GLETSCHER02	2020-11-03	877.38	928.22	-50.84
SAQQAP-MAJORQAQ-SOUTHTERRUSSEL_SOUTHQUARUSSEL01	2013-07-05	1592.16	1609.23	-17.07
SAQQAP-MAJORQAQ-SOUTHTERRUSSEL_SOUTHQUARUSSEL01	2013-07-06	1592.92	1609.95	-17.02
SAQQAP-MAJORQAQ-SOUTHTERRUSSEL_SOUTHQUARUSSEL01	2014-07-30	1600.2	1613.79	-13.59
SAQQAP-MAJORQAQ-SOUTHTERRUSSEL_SOUTHQUARUSSEL01	2014-11-01	1594.85	1612.44	-17.59
SAQQAP-MAJORQAQ-SOUTHTERRUSSEL_SOUTHQUARUSSEL01	2016-08-19	1598.64	1607.24	-8.59
SAQQAP-MAJORQAQ-SOUTHTERRUSSEL_SOUTHQUARUSSEL01	2019-09-20	1596.61	1618.37	-21.76
SAQQAP-MAJORQAQ-SOUTHTERRUSSEL_SOUTHQUARUSSEL01	2019-12-19	1594.57	1608.71	-14.14
SAQQAP-MAJORQAQ-SOUTHTERRUSSEL_SOUTHQUARUSSEL01	2020-06-18	1594.89	1617.51	-22.63
SAQQAP-MAJORQAQ-SOUTHTERRUSSEL_SOUTHQUARUSSEL01	2020-09-17	1594.41	1617.98	-23.57
SAQQAP-MAJORQAQ-SOUTHTERRUSSEL_SOUTHQUARUSSEL01	2020-12-17	1596.76	1619.71	-22.96
SAQQAP-MAJORQAQ-SOUTHTERRUSSEL_SOUTHQUARUSSEL02	2012-08-20	1410.39	1420.83	-10.43
SAQQAP-MAJORQAQ-SOUTHTERRUSSEL_SOUTHQUARUSSEL02	2013-06-10	1411.82	1420.77	-8.95
SAQQAP-MAJORQAQ-SOUTHTERRUSSEL_SOUTHQUARUSSEL02	2013-06-18	1413.48	1422.92	-9.44
SAQQAP-MAJORQAQ-SOUTHTERRUSSEL_SOUTHQUARUSSEL02	2015-04-27	1407.91	1418.71	-10.8
SAQQAP-MAJORQAQ-SOUTHTERRUSSEL_SOUTHQUARUSSEL02	2015-06-12	1411.56	1422.39	-10.83
SAQQAP-MAJORQAQ-SOUTHTERRUSSEL_SOUTHQUARUSSEL02	2016-03-14	1421.88	1427.56	-5.68
SAQQAP-MAJORQAQ-SOUTHTERRUSSEL_SOUTHQUARUSSEL02	2016-08-17	1412.24	1422.01	-9.77
SAQQAP-MAJORQAQ-SOUTHTERRUSSEL_SOUTHQUARUSSEL02	2017-02-09	1415.88	1425.49	-9.62
SAQQAP-MAJORQAQ-SOUTHTERRUSSEL_SOUTHQUARUSSEL02	2019-04-20	1423.66	1425.37	-1.71
SAQQAP-MAJORQAQ-SOUTHTERRUSSEL_SOUTHQUARUSSEL02	2020-01-17	1409.57	1423.1	-13.52
SAQQAP-MAJORQAQ-SOUTHTERRUSSEL_SOUTHQUARUSSEL02	2020-04-17	1410.28	1423.25	-12.96
SAQQAP-MAJORQAQ-SOUTHTERRUSSEL_SOUTHQUARUSSEL02	2020-07-17	1417.97	1424	-6.03
SAQQARLIUP_ALANGORLIUP01	2010-05-30	1607.55	1614.3	-6.75
SAQQARLIUP_ALANGORLIUP01	2010-06-20	1617.37	1624.35	-6.98
SAQQARLIUP_ALANGORLIUP01	2010-09-28	1618.2	1623.83	-5.63
SAQQARLIUP_ALANGORLIUP01	2011-06-01	1629.05	1635.11	-6.06
SAQQARLIUP_ALANGORLIUP01	2011-09-19	1610.39	1615.08	-4.68
SAQQARLIUP_ALANGORLIUP01	2012-06-30	1610.96	1615.57	-4.61
SAQQARLIUP_ALANGORLIUP01	2012-07-26	1615.67	1619.39	-3.71
SAQQARLIUP_ALANGORLIUP01	2013-06-10	1617.4	1620.96	-3.56
SAQQARLIUP_ALANGORLIUP01	2013-07-05	1614.63	1618.26	-3.64
SAQQARLIUP_ALANGORLIUP01	2015-05-26	1609.08	1613.13	-4.05
SAQQARLIUP_ALANGORLIUP01	2017-03-12	1617.34	1619.25	-1.91
SAQQARLIUP_ALANGORLIUP01	2017-05-27	1607.92	1612.54	-4.62
SAQQARLIUP_ALANGORLIUP01	2019-05-03	1598.83	1619.31	-20.48
SAQQARLIUP_ALANGORLIUP01	2019-08-02	1600.85	1619.58	-18.73
SAQQARLIUP_ALANGORLIUP01	2020-05-01	1601.25	1619.73	-18.48
SAQQARLIUP_ALANGORLIUP01	2020-10-29	1604.03	1620.44	-16.42
SAQQARLIUP_ALANGORLIUP02	2010-05-26	1520.58	1525.64	-5.06
SAQQARLIUP_ALANGORLIUP02	2010-05-30	1522.41	1527.99	-5.58
SAQQARLIUP_ALANGORLIUP02	2010-06-20	1532.54	1538.24	-5.69
SAQQARLIUP_ALANGORLIUP02	2010-09-24	1527.39	1531.28	-3.88
SAQQARLIUP_ALANGORLIUP02	2010-09-28	1534.58	1538.26	-3.68
SAQQARLIUP_ALANGORLIUP02	2011-04-15	1524.07	1530.73	-6.65
SAQQARLIUP_ALANGORLIUP02	2011-05-14	1516.73	1523.29	-6.56
SAQQARLIUP_ALANGORLIUP02	2011-06-01	1542.54	1548.24	-5.7
SAQQARLIUP_ALANGORLIUP02	2012-06-30	1521.43	1527.15	-5.72
SAQQARLIUP_ALANGORLIUP02	2013-07-05	1528.47	1531.56	-3.09
SAQQARLIUP_ALANGORLIUP02	2017-03-12	1530.65	1534.01	-3.36
SAQQARLIUP_ALANGORLIUP02	2019-04-04	1518.46	1532.81	-14.35
SAQQARLIUP_ALANGORLIUP02	2020-01-02	1524.18	1531.45	-7.27
SAQQARLIUP_ALANGORLIUP02	2020-04-02	1523.74	1531.77	-8.04
SAQQARLIUP_ALANGORLIUP02	2020-07-02	1523.4	1531.46	-8.06
SAQQARLIUP_ALANGORLIUP02	2020-09-30	1522.72	1531.26	-8.55
SERMEQ_AVANNARLEQ2_01	2013-05-29	1374.52	1384.06	-9.55
SERMEQ_AVANNARLEQ2_01	2013-06-09	1376.66	1386.27	-9.62
SERMEQ_AVANNARLEQ2_01	2015-07-11	1376.98	1385.11	-8.13
SERMEQ_AVANNARLEQ2_01	2016-08-12	1382.05	1386.04	-3.99
SERMEQ_AVANNARLEQ2_01	2017-07-06	1377.94	1386.14	-8.2
SERMEQ_AVANNARLEQ2_01	2019-05-15	1378.28	1389.26	-10.97
SERMEQ_AVANNARLEQ2_01	2019-08-14	1381.22	1388.21	-7
SERMEQ_AVANNARLEQ2_01	2019-11-13	1377.83	1385.61	-7.78
SERMEQ_AVANNARLEQ2_01	2020-02-12	1377.85	1385.86	-8.01
SERMEQ_AVANNARLEQ2_01	2020-05-13	1377.54	1388.66	-11.12
SERMEQ_AVANNARLEQ2_01	2020-08-11	1376.22	1385.76	-9.55
SERMEQ_AVANNARLEQ2_01	2020-11-10	1376.26	1388.6	-12.34
SERMEQ_KUJALLEQ01	2012-06-13	1316.77	1317.47	-0.7
SERMEQ_KUJALLEQ01	2013-06-09	1314.05	1314.79	-0.74
SERMEQ_KUJALLEQ01	2014-06-18	1317.35	1317.72	-0.37
SERMEQ_KUJALLEQ01	2014-10-07	1320.24	1320.37	-0.13
SERMEQ_KUJALLEQ01	2015-02-19	1316.75	1316.91	-0.16
SERMEQ_KUJALLEQ01	2015-07-11	1317.52	1317.55	-0.04
SERMEQ_KUJALLEQ01	2016-07-28	1312.62	1313.39	-0.76
SERMEQ_KUJALLEQ01	2016-08-12	1311.94	1312.69	-0.75
SERMEQ_KUJALLEQ01	2017-07-15	1311.39	1312.1	-0.7
SERMEQ_KUJALLEQ01	2020-01-10	1311.41	1317.71	-6.3
SERMEQ_KUJALLEQ01	2020-04-10	1311.62	1317.85	-6.23
SERMEQ_KUJALLEQ01	2020-10-08	1314.67	1317.7	-3.03
SERMEQ_KUJALLEQ02	2012-06-13	1380.6	1388.6	-8
SERMEQ_KUJALLEQ02	2013-06-09	1380.13	1388.14	-8.01
SERMEQ_KUJALLEQ02	2013-06-13	1375.59	1381.11	-5.51
SERMEQ_KUJALLEQ02	2014-06-18	1390.25	1392.85	-2.6
SERMEQ_KUJALLEQ02	2014-10-07	1382.15	1390.21	-8.06
SERMEQ_KUJALLEQ02	2015-02-19	1379.61	1387.48	-7.87
SERMEQ_KUJALLEQ02	2016-07-28	1379.79	1387.86	-8.08
SERMEQ_KUJALLEQ02	2017-07-15	1377.74	1385.65	-7.91
SERMEQ_KUJALLEQ02	2020-01-10	1371.35	1391.95	-20.6
SERMEQ_KUJALLEQ02	2020-04-10	1371.56	1392.05	-20.49
SERMEQ_KUJALLEQ02	2020-10-08	1374.55	1389.73	-15.18
STEENSTRUP-DIETRICHSON01	2012-07-13	1202.51	1209.2	-6.7
STEENSTRUP-DIETRICHSON01	2014-03-09	1198.05	1206.87	-8.82
STEENSTRUP-DIETRICHSON01	2015-04-17	1198.91	1208.63	-9.72
STEENSTRUP-DIETRICHSON01	2016-03-26	1197.35	1204.94	-7.59
STEENSTRUP-DIETRICHSON01	2016-06-02	1194.32	1206.44	-12.12
STEENSTRUP-DIETRICHSON01	2017-05-04	1182.47	1200.66	-18.19
STEENSTRUP-DIETRICHSON01	2017-05-12	1181.37	1200.62	-19.25
STEENSTRUP-DIETRICHSON01	2017-05-13	1184.55	1202.73	-18.18
STEENSTRUP-DIETRICHSON01	2017-05-15	1182.74	1200.81	-18.07
STEENSTRUP-DIETRICHSON01	2017-06-15	1184.92	1202.89	-17.97
STEENSTRUP-DIETRICHSON01	2017-06-20	1182.72	1200.68	-17.96
STEENSTRUP-DIETRICHSON01	2017-06-23	1188.35	1206.35	-17.99
STEENSTRUP-DIETRICHSON01	2017-06-26	1182.72	1200.64	-17.92
STEENSTRUP-DIETRICHSON01	2017-06-27	1184.27	1202.15	-17.88
STEENSTRUP-DIETRICHSON01	2017-07-03	1188.16	1206.04	-17.88
STEENSTRUP-DIETRICHSON01	2017-07-04	1185.65	1202.49	-16.84
STEENSTRUP-DIETRICHSON01	2017-07-05	1183.86	1201.76	-17.9
STEENSTRUP-DIETRICHSON01	2017-07-06	1190.87	1208.76	-17.89
STEENSTRUP-DIETRICHSON01	2017-07-07	1185.74	1202.15	-16.41
STEENSTRUP-DIETRICHSON01	2017-07-15	1189.78	1208.06	-18.28
STEENSTRUP-DIETRICHSON01	2017-07-16	1184.99	1202.86	-17.87
STEENSTRUP-DIETRICHSON01	2017-07-19	1183.79	1201.6	-17.81
STEENSTRUP-DIETRICHSON01	2017-07-23	1188.41	1208.24	-19.83
STEENSTRUP-DIETRICHSON01	2017-07-25	1185.27	1203.2	-17.93
STEENSTRUP-DIETRICHSON01	2017-07-28	1183.51	1201.21	-17.7
STEENSTRUP-DIETRICHSON01	2017-08-04	1184.82	1202.59	-17.76
STEENSTRUP-DIETRICHSON01	2017-08-17	1186.33	1203.96	-17.63
STEENSTRUP-DIETRICHSON01	2017-08-18	1183.13	1200.74	-17.61
STEENSTRUP-DIETRICHSON01	2017-08-19	1184.01	1201.59	-17.58
STEENSTRUP-DIETRICHSON01	2017-08-20	1186.14	1203.64	-17.5
STEENSTRUP-DIETRICHSON01	2017-08-23	1185.89	1203.39	-17.5
STEENSTRUP-DIETRICHSON01	2017-08-25	1190.22	1207.69	-17.48
STEENSTRUP-DIETRICHSON01	2017-09-05	1182.64	1199.98	-17.34
STEENSTRUP-DIETRICHSON01	2017-09-07	1181.67	1199.04	-17.38
STEENSTRUP-DIETRICHSON01	2017-09-08	1185.18	1202.62	-17.44
STEENSTRUP-DIETRICHSON01	2017-09-26	1189.12	1206.38	-17.26
STEENSTRUP-DIETRICHSON01	2017-09-27	1191.83	1209.12	-17.29
STEENSTRUP-DIETRICHSON01	2017-10-01	1185.58	1202.82	-17.25
STEENSTRUP-DIETRICHSON01	2019-04-02	1185.76	1198.41	-12.65
STEENSTRUP-DIETRICHSON01	2019-10-01	1188.89	1197.78	-8.89
STEENSTRUP-DIETRICHSON01	2019-12-31	1189.2	1198.87	-9.66
STEENSTRUP-DIETRICHSON02	2012-07-13	1206.56	1210.44	-3.88
STEENSTRUP-DIETRICHSON02	2013-05-28	1207.87	1213.77	-5.91
STEENSTRUP-DIETRICHSON02	2014-03-09	1203.8	1208.13	-4.34
STEENSTRUP-DIETRICHSON02	2016-03-26	1201.23	1205.41	-4.18
STEENSTRUP-DIETRICHSON02	2017-05-04	1177.62	1194.28	-16.66
STEENSTRUP-DIETRICHSON02	2017-05-12	1176.09	1192.7	-16.61
STEENSTRUP-DIETRICHSON02	2017-05-13	1179.94	1196.59	-16.65
STEENSTRUP-DIETRICHSON02	2017-05-15	1177.26	1193.84	-16.59
STEENSTRUP-DIETRICHSON02	2017-06-15	1179.81	1196.44	-16.63
STEENSTRUP-DIETRICHSON02	2017-06-20	1177.62	1194.24	-16.62
STEENSTRUP-DIETRICHSON02	2017-06-23	1182.44	1199.04	-16.6
STEENSTRUP-DIETRICHSON02	2017-06-26	1180.26	1195.44	-15.18
STEENSTRUP-DIETRICHSON02	2017-06-27	1178.3	1194.92	-16.62
STEENSTRUP-DIETRICHSON02	2017-07-03	1182.38	1199.08	-16.7
STEENSTRUP-DIETRICHSON02	2017-07-04	1180.08	1196.62	-16.54
STEENSTRUP-DIETRICHSON02	2017-07-05	1178.49	1195.08	-16.59
STEENSTRUP-DIETRICHSON02	2017-07-06	1184.76	1201.5	-16.73
STEENSTRUP-DIETRICHSON02	2017-07-07	1179.32	1193.86	-14.54
STEENSTRUP-DIETRICHSON02	2017-07-15	1183.17	1194.27	-11.09
STEENSTRUP-DIETRICHSON02	2017-07-16	1179.11	1195.7	-16.59
STEENSTRUP-DIETRICHSON02	2017-07-19	1177.87	1194.46	-16.6
STEENSTRUP-DIETRICHSON02	2017-07-23	1182.07	1193.3	-11.23
STEENSTRUP-DIETRICHSON02	2017-07-28	1176.87	1190.84	-13.96
STEENSTRUP-DIETRICHSON02	2017-08-04	1178.47	1195.12	-16.65
STEENSTRUP-DIETRICHSON02	2017-08-17	1179.47	1196.12	-16.65
STEENSTRUP-DIETRICHSON02	2017-08-18	1177.72	1194.29	-16.56
STEENSTRUP-DIETRICHSON02	2017-08-19	1179.05	1195.6	-16.55
STEENSTRUP-DIETRICHSON02	2017-08-20	1178.03	1192.96	-14.92
STEENSTRUP-DIETRICHSON02	2017-08-22	1179.24	1195.02	-15.78
STEENSTRUP-DIETRICHSON02	2017-08-23	1179.37	1195.88	-16.51
STEENSTRUP-DIETRICHSON02	2017-08-25	1183.16	1199.74	-16.58
STEENSTRUP-DIETRICHSON02	2017-09-05	1175.89	1192.39	-16.5
STEENSTRUP-DIETRICHSON02	2017-09-07	1176.06	1192.47	-16.41
STEENSTRUP-DIETRICHSON02	2017-09-08	1179.08	1195.54	-16.46
STEENSTRUP-DIETRICHSON02	2017-09-26	1182.9	1199.29	-16.4
STEENSTRUP-DIETRICHSON02	2017-09-27	1184.89	1201.26	-16.37
STEENSTRUP-DIETRICHSON02	2017-10-01	1179.06	1195.43	-16.37
STEENSTRUP-DIETRICHSON02	2019-04-02	1187.86	1204.74	-16.88
STEENSTRUP-DIETRICHSON02	2019-10-01	1189.75	1202.37	-12.62
STEENSTRUP-DIETRICHSON02	2019-12-31	1191.42	1202.8	-11.38
STEENSTRUP-DIETRICHSON03	2012-08-03	1017.74	1036.01	-18.27
STEENSTRUP-DIETRICHSON03	2013-03-22	1022.28	1036.77	-14.48
STEENSTRUP-DIETRICHSON03	2013-03-26	1019.56	1037.11	-17.55
STEENSTRUP-DIETRICHSON03	2013-05-28	1020.98	1038.71	-17.74
STEENSTRUP-DIETRICHSON03	2013-08-10	1023.63	1036.12	-12.49
STEENSTRUP-DIETRICHSON03	2014-03-08	1005.14	1019.83	-14.69
STEENSTRUP-DIETRICHSON03	2014-03-13	1024.92	1038.4	-13.48
STEENSTRUP-DIETRICHSON03	2015-03-03	1028.59	1039.82	-11.23
STEENSTRUP-DIETRICHSON03	2015-04-15	1025.27	1036.68	-11.41
STEENSTRUP-DIETRICHSON03	2015-04-16	1026.98	1038.55	-11.57
STEENSTRUP-DIETRICHSON03	2016-03-25	1024.82	1032.06	-7.24
STEENSTRUP-DIETRICHSON03	2017-04-22	1019.96	1032.81	-12.85
STEENSTRUP-DIETRICHSON03	2017-04-29	1022.73	1035.72	-12.99
STEENSTRUP-DIETRICHSON03	2019-09-11	1006.59	1022.45	-15.86
STEENSTRUP-DIETRICHSON03	2019-12-10	1007.71	1022.99	-15.27
STEENSTRUP-DIETRICHSON03	2020-03-10	1008.14	1023.06	-14.93
STEENSTRUP-DIETRICHSON03	2020-06-09	1008.6	1022.86	-14.26
STEENSTRUP-DIETRICHSON03	2020-09-08	1011.97	1022.04	-10.07
STORE_GLETSCHER01	2013-05-29	1304.8	1349.42	-44.62
STORE_GLETSCHER01	2013-06-09	1316.44	1364.14	-47.7
STORE_GLETSCHER01	2014-06-18	1312.01	1328.21	-16.2
STORE_GLETSCHER01	2015-07-11	1307.13	1350.35	-43.21
STORE_GLETSCHER01	2016-02-15	1303.09	1345.81	-42.72
STORE_GLETSCHER01	2016-08-12	1304.83	1349.49	-44.66
STORE_GLETSCHER01	2017-07-06	1305.85	1351.02	-45.17
STORE_GLETSCHER01	2017-07-26	1307.67	1353.49	-45.82
STORE_GLETSCHER01	2019-05-15	1304.86	1319.04	-14.18
STORE_GLETSCHER01	2019-08-14	1316.16	1321.46	-5.3
STORE_GLETSCHER01	2019-11-13	1300.48	1317.78	-17.31
STORE_GLETSCHER01	2020-02-12	1301.3	1318.2	-16.9
STORE_GLETSCHER01	2020-05-13	1301.42	1318.43	-17.02
STORE_GLETSCHER01	2020-08-11	1306.29	1317.97	-11.68
STORE_GLETSCHER01	2020-11-10	1306.87	1318.28	-11.41
STORE_GLETSCHER02	2012-07-08	1280.71	1283.21	-2.5
STORE_GLETSCHER02	2013-05-29	1272.29	1277.4	-5.1
STORE_GLETSCHER02	2014-06-18	1278.87	1280.83	-1.96
STORE_GLETSCHER02	2015-07-11	1281.34	1282.22	-0.88
STORE_GLETSCHER02	2016-02-15	1283.64	1285.19	-1.55
STORE_GLETSCHER02	2016-08-11	1256.97	1265.96	-8.99
STORE_GLETSCHER02	2016-08-12	1262.27	1271.34	-9.08
STORE_GLETSCHER02	2017-07-06	1267.87	1275.09	-7.22
STORE_GLETSCHER02	2017-07-12	1264.06	1271.87	-7.81
STORE_GLETSCHER02	2017-07-26	1271.92	1279.65	-7.73
STORE_GLETSCHER02	2019-04-16	1281.22	1282.19	-0.97
STORE_GLETSCHER02	2019-10-15	1276.46	1278.9	-2.44
STORE_GLETSCHER02	2020-01-14	1264.02	1278.93	-14.91
SVERDRUP_GLETSCHER01	2012-05-24	1108.47	1119.86	-11.38
SVERDRUP_GLETSCHER01	2012-08-03	1107.13	1119.58	-12.44
SVERDRUP_GLETSCHER01	2013-03-22	1101.29	1118.79	-17.5
SVERDRUP_GLETSCHER01	2013-03-26	1098.89	1116.15	-17.27
SVERDRUP_GLETSCHER01	2013-05-28	1100.37	1118.61	-18.23
SVERDRUP_GLETSCHER01	2014-03-08	1083.48	1111	-27.52
SVERDRUP_GLETSCHER01	2014-03-13	1102.6	1116.69	-14.09
SVERDRUP_GLETSCHER01	2015-03-03	1105.17	1119.37	-14.2
SVERDRUP_GLETSCHER01	2015-04-15	1102.12	1118.02	-15.9
SVERDRUP_GLETSCHER01	2015-04-16	1102.99	1119.03	-16.04
SVERDRUP_GLETSCHER01	2016-03-25	1114.56	1126.6	-12.04
SVERDRUP_GLETSCHER01	2017-04-22	1100.19	1115.68	-15.49
SVERDRUP_GLETSCHER01	2017-04-29	1102.75	1118.29	-15.54
SVERDRUP_GLETSCHER01	2019-04-06	1098.22	1123.68	-25.46
SVERDRUP_GLETSCHER01	2019-10-05	1099.08	1118.82	-19.74
SVERDRUP_GLETSCHER01	2020-01-04	1099.23	1118.53	-19.3
SVERDRUP_GLETSCHER01	2020-04-04	1098.76	1122.11	-23.34
SVERDRUP_GLETSCHER01	2020-07-04	1096.16	1121.9	-25.74
USULLUUP_SERMIA01	2013-07-16	1622.04	1626.46	-4.41
USULLUUP_SERMIA01	2013-09-20	1627.92	1628.9	-0.97
USULLUUP_SERMIA01	2015-04-08	1629.97	1633.03	-3.06
USULLUUP_SERMIA01	2015-05-07	1623.95	1626.22	-2.27
USULLUUP_SERMIA01	2016-09-21	1628.49	1630.35	-1.85
USULLUUP_SERMIA01	2017-03-11	1622.28	1624.46	-2.18
USULLUUP_SERMIA01	2017-03-24	1629.16	1630.67	-1.52
USULLUUP_SERMIA01	2019-10-11	1622.42	1630.36	-7.93
USULLUUP_SERMIA01	2020-04-09	1597.77	1629.08	-31.31
USULLUUP_SERMIA01	2020-10-08	1601.15	1631.96	-30.81
USULLUUP_SERMIA02	2013-03-23	1439.73	1449.45	-9.72
USULLUUP_SERMIA02	2013-06-06	1437.23	1446.86	-9.63
USULLUUP_SERMIA02	2014-06-21	1439	1456.36	-17.36
USULLUUP_SERMIA02	2015-10-24	1438.07	1447.29	-9.21
USULLUUP_SERMIA02	2016-02-06	1439.86	1453.73	-13.87
USULLUUP_SERMIA02	2016-03-15	1439.53	1452.38	-12.86
USULLUUP_SERMIA02	2016-03-29	1437.18	1446.24	-9.06
USULLUUP_SERMIA02	2017-09-04	1435.97	1439.06	-3.09
USULLUUP_SERMIA02	2017-09-09	1437.45	1447	-9.55
USULLUUP_SERMIA02	2019-10-15	1439.66	1447.17	-7.51
USULLUUP_SERMIA02	2020-01-13	1436.9	1446.15	-9.26
USULLUUP_SERMIA02	2020-04-13	1437.12	1446.35	-9.23
USULLUUP_SERMIA02	2020-07-13	1437.06	1446.98	-9.92
VESTFJORD01	2013-08-11	1553.44	1613.51	-60.07
VESTFJORD01	2014-04-02	1557.64	1616.31	-58.67
VESTFJORD01	2014-05-17	1559.13	1608.84	-49.7
VESTFJORD01	2015-05-21	1569.57	1617.89	-48.32
VESTFJORD01	2015-06-15	1564.95	1614.19	-49.24
VESTFJORD01	2015-07-18	1575.79	1614.93	-39.14
VESTFJORD01	2015-09-28	1580.1	1617.1	-37
VESTFJORD01	2015-10-01	1580.89	1617.99	-37.1
VESTFJORD01	2016-02-08	1579.84	1616.76	-36.92
VESTFJORD01	2016-02-11	1580.64	1617.71	-37.07
VESTFJORD01	2016-02-27	1582.41	1618.98	-36.57
VESTFJORD01	2016-03-01	1586.95	1621.7	-34.76
VESTFJORD01	2016-06-08	1579.05	1615.71	-36.66
VESTFJORD01	2017-04-25	1590.02	1619.67	-29.65
VESTFJORD01	2017-07-19	1587.23	1615.56	-28.33
VESTFJORD01	2017-08-02	1591.9	1618.22	-26.32
VESTFJORD01	2019-05-10	1595.4	1619.07	-23.68
VESTFJORD01	2019-11-07	1537.36	1616.56	-79.21
VESTFJORD01	2020-11-05	1556.83	1619.06	-62.23
